# Supplementary material for: Concise syntheses of bridged morpholines
Source: Royal Society of Chemistry journal article supplement (doi:10.1039/c6ra08737j), 2016-01-01
Supplement: c6ra08737j1.pdf [file c6ra08737j1.pdf]

## Concise Syntheses of Bridged Morpholines

Andrey V. Zaytsev, James E. Pickles, Suzannah J. Harnor, Alistair P. Henderson, Mohammed Aliasiri, Paul G. Waddell, Celine Cano, Roger J. Griffin,<sup>‡</sup> and Bernard T. Golding

### Supporting Information

#### Experimental Section

##### General Information

<sup>1</sup>H, <sup>2</sup>H and <sup>13</sup>C nuclear magnetic resonance (NMR) spectra were obtained as solutions in a suitable deuterated solvent and recorded at 500 MHz, 76 MHz and 125 MHz, respectively, on a Bruker Avance III 500 spectrometer. Chemical shifts are reported in parts per million ( $\delta$ ) referenced to the deuterated solvent employed. Multiplicities are indicated by s (singlet), d (doublet), t (triplet), q (quartet), m (multiplet), b (broad), hep (heptet) or combinations thereof. LCMS was carried out on a Waters Acquity SQD operating in positive and negative ion electrospray mode, employing a 50  $\times$  2.1 mm, Waters Acquity UPLC BEH C18, 1.7  $\mu$ m column and a 1.5 min gradient elution of 0.1% aqueous formic acid and acetonitrile (5–95%) at a flow rate of 0.6 mL min<sup>-1</sup>. High resolution mass spectrometry were measured using a Finnigan MAT 95 XP or a Finnigan MAT 900 XLT by the EPSRC National Mass Spectrometry Service Centre, University of Wales (Swansea), Singleton Park, Swansea, SA2 8PP. Infrared (IR) spectra were recorded on a Bio-Rad FTS 3000MX diamond ATR as a neat sample. UV spectra were obtained using a U-2001 Hitachi Spectrophotometer with the sample dissolved in ethanol. All commercial reagents and solvents were purchased from reputable suppliers. Where petrol is stated, this refers to the fraction of alkanes, which boils between 40 °C and 60 °C. The chemicals were of the highest available purity and used as supplied unless otherwise stated. Anhydrous solvents were stored under nitrogen. Reactions requiring microwave irradiation were carried out in a Biotage Initiator<sup>TM</sup> Sixty reactor.

##### General procedure A

10% Pd/C (~ 10 wt%) was added to the carboxylic acid (for typical scale see below) dissolved in AcOH (1.5 mL/mmol). Following evacuation, an atmosphere of hydrogen was introduced *via* a balloon. After stirring vigorously for 69 h at 60 °C, the suspension was filtered through a Celite plug, eluting with AcOH (1.5 mL/mmol). The solvent was removed *in vacuo* and the resultant solid was dissolved in water (0.6 mL/mmol) before the addition of 35% ammonium

hydroxide in water (0.6 mL/mmol). The mixture was stirred at RT for 30 min after which it was concentrated and dried *in vacuo* to afford the product.

### General procedure B

A reaction vessel was equipped with a stirrer bar, finely powdered diammonium salt (for typical scale see below and covered with glass wool. The mixture was stirred and heated at 230 °C for 6 h. EtOAc (10 mL/mmol) was added along with sat. sodium bicarbonate solution (10 mL/mmol) and the mixture was sonicated to dissolve all the solids. The aqueous layer was extracted twice with EtOAc and the collated organic layers were dried (MgSO<sub>4</sub>) and evaporated to dryness.

### General procedure C

Under an inert atmosphere, to the imide (for typical scale see below) in anhydrous THF (2.3 mL/mmol) was added 1 M BH<sub>3</sub>-THF solution (4 mmol per mmol substrate) was added cautiously and the reaction mixture was heated at reflux for 3 h. After cooling to RT, the reaction was quenched MeOH until effervescence ceased, evaporated to dryness and taken up in MeOH (1.7 mL/mmol). A 1.25 M solution of hydrogen chloride in MeOH (1.7 mL/mmol) was added and, under nitrogen, the solution was heated at reflux for 3 h. After cooling to RT, the solvent was removed *in vacuo* and the crude product was purified by recrystallisation from MeOH-diethyl ether.

### Diammonium tetrahydrofuran-2,5-dicarboxylate **4**:

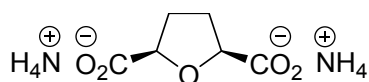

Prepared according to general procedure A with the following reagents: 2,5-furandicarboxylic acid (**3**, 5.00 g, 32.0 mmol), Pd/C (510 mg), AcOH (50 mL), water (20 mL) and 35% ammonium hydroxide in water (20 mL) affording **4** as a white solid (6.06 g, 32.0 mmol, 100%);  $R_f = 0.51$  (DCM:MeOH, 90:10); m.p: 227–230 °C; IR  $\nu_{\max}/\text{cm}^{-1}$  3178, 2993, 2869, 2778, 1699, 1545; <sup>1</sup>H NMR (500 MHz, D<sub>2</sub>O)  $\delta$  1.73–1.79 (2H, m, 2 × CH), 2.13–2.20 (2H, m, 2 × CH), 4.10–4.16 (2H, m, 2 × CH); <sup>13</sup>C NMR (125 MHz, D<sub>2</sub>O)  $\delta$  30.1, 79.7, 180.4); HRMS calcd. for C<sub>6</sub>H<sub>6</sub>O<sub>5</sub>  $m/z$  [M+H]<sup>+</sup> 159.0296, found 159.0299.

### 8-Oxa-3-azabicyclo[3.2.1]octane-2,4-dione **5**:

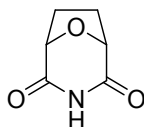

Prepared according to general procedure B starting from **4** (200 mg, 1.03 mmol), which gave **5** as a white solid (110 mg, 0.80 mmol, 78%).  $R_f = 0.60$  (EtOAc); mp: 133–137 °C; IR  $\nu_{\max}/\text{cm}^{-1}$  3082, 2839, 1907, 1713;  $^1\text{H}$  NMR (500 MHz, DMSO- $d_6$ )  $\delta$  1.92–1.97 (2H, m, 2  $\times$  CH), 2.13–2.21 (2H, m, 2  $\times$  CH), 4.70–4.74 (2H, m, 2  $\times$  CH), 11.10 (1H, br s, NH);  $^{13}\text{C}$  NMR (125 MHz, DMSO- $d_6$ )  $\delta$  30.1, 79.7, 180.4; HRMS calcd. for  $\text{C}_6\text{H}_7\text{NO}_3$   $m/z$   $[\text{M}+\text{H}]^+$  142.0499, found 142.0496.

### 8-Oxa-3-azabicyclo[3.2.1]octane hydrochloride **1a**:

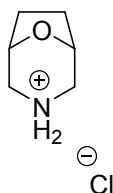

Prepared according to general procedure C with the following reagents: **5** (306 mg, 2.17 mmol), THF (5 mL), 1 M  $\text{BH}_3$ -THF solution (8.7 mL, 8.7 mmol), MeOH (5 mL), 1.25 M solution of hydrogen chloride in MeOH (6 mL) affording **1a** as an off white solid (0.227 g, 1.52 mmol, 70%);  $R_f = 0.93$  (EtOAc); mp: 192–195 °C; IR  $\nu_{\max}/\text{cm}^{-1}$  2958, 2899, 2845, 2768, 2660, 2548, 2492, 2360, 2293, 1598;  $^1\text{H}$  NMR (500 MHz, DMSO- $d_6$ )  $\delta$  1.91–1.98 (2H, m, 2  $\times$  CH), 2.03–2.09 (2H, m, 2  $\times$  CH), 2.95–3.06 (4H, m, 4  $\times$  CH), 4.37–4.41 (2H, m, 2  $\times$  CH), 8.93–9.37 (2H, m,  $\text{NH}_2$ );  $^{13}\text{C}$  NMR (125 MHz, DMSO- $d_6$ )  $\delta$  26.6, 47.1, 71.6; HRMS calcd. for  $\text{C}_6\text{H}_{11}\text{NO}$   $m/z$   $[\text{M}+\text{H}]^+$  114.0912, found 114.0913.

### 8-Oxa-3-azabicyclo[3.2.1]octan-3-ium-2,2,4,4-*d*<sub>4</sub> chloride **1b**:

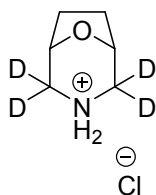

Prepared according to general procedure C with the following reagents: **5** (345 mg, 2.45 mmol), THF (5.6 mL), 1 M BD<sub>3</sub>-THF solution (9.79 mL, 9.79 mmol), MeOH (5.6 mL), 1.25 M HCl in MeOH (5.6 mL) yielding **1b** as an off-white solid (113 mg, 0.96 mmol, 30%); R<sub>f</sub> = 0.21 (DCM:MeOH, 80:20); mp: 192-198 °C; <sup>1</sup>H NMR (500 MHz, DMSO-*d*<sub>6</sub>) δ 1.90-1.97 (2H, m, 2 × CH), 2.04-2.10 (2H, m, 2 × CH), 2.95-3.05 (0.76 H, m, non-deuterated material), 4.37-4.41 (2H, m, 2 × CH), 9.38 (2H, br s, NH<sub>2</sub>); <sup>13</sup>C NMR (125 MHz, DMSO-*d*<sub>6</sub>) δ 27.3 (CH<sub>2</sub>), 46.3-47.5 (1:2:3:2:1 pent, 2 × CD<sub>2</sub>), 72.0 (CH); ; HRMS calcd. for C<sub>6</sub>H<sub>7</sub>D<sub>4</sub>NO *m/z* [M+H]<sup>+</sup> 118.1164, found 118.1161.

### 4*H*-Pyran-2,6-dicarboxylic acid<sup>1,2</sup>

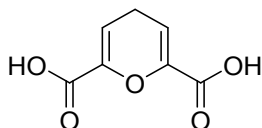

To a stirred solution of tetraethyl 1,5-dioxopentane-1,2,4,5-tetracarboxylate (1.59 g, 4.10 mmol) in water (1.6 mL) was added concentrated hydrochloric acid (1.6 mL). The mixture was heated at reflux for 6 h, after which the solvent was removed in *vacuo*. To the stirred residue was added conc. sulfuric acid (2 mL) dropwise. The mixture was cooled to 0 °C and stirred for 18 h. Ice-cold water was added to give a precipitate which was filtered, washed with ice cold water (3 × 10 mL) and dried to give a brown solid. According to <sup>1</sup>H NMR analysis this product was a mixture of the title compound and ethyl ester(s). The mixture was taken up in THF (25 mL) and 2M aqueous NaOH (22.5 mL) was added. After stirring at room temperature overnight, the resulting solution was acidified with 2M HCl. The precipitate was filtered, washed with ice-cold water and dried to afford the title compound as a brown solid (0.50 g, 2.9 mmol, 71%). R<sub>f</sub> = 0.15 (DCM:MeOH, 95:5); mp = 250 °C dec; λ<sub>max</sub> (EtOH/nm) 234; IR (neat) ν<sub>max</sub>/cm<sup>-1</sup> 3420, 3014, 2845, 1724, 1632; <sup>1</sup>H NMR (500 MHz, DMSO-*d*<sub>6</sub>) δ 3.02 (2H, t, *J* = 3.7 Hz, CH<sub>2</sub>), 6.01 (2H, t, *J* = 3.7 Hz), 13.1 (2H, br s, 2 × OH); <sup>13</sup>C NMR (125 MHz, DMSO-*d*<sub>6</sub>) δ 21.6 (CH<sub>2</sub>), 110.2 (CH), 142.2 (CH), 162.2 (C=O); HRMS calcd. for C<sub>7</sub>H<sub>6</sub>O<sub>5</sub> *m/z* [M+H]<sup>+</sup> 171.0288, found 171.0288.

**Diammonium (2*R*,6*S*)-tetrahydro-2*H*-pyran-2,6-dicarboxylate **6a**:**

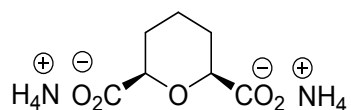

Prepared according to general procedure A with the following reagents: 4*H*-pyran-2,6-dicarboxylic acid (3.47 g, 20.5 mmol), AcOH (70 mL), Pd/C (326 mg), water (35 mL) and 35% ammonium hydroxide solution (6.3 mL). Compound **6a** was an off-white solid (4.16 g, 20 mmol, 98%).  $R_f = 0.41$  (DCM:MeOH, 60:40); mp: 212-220 °C; IR  $\nu_{\max}/\text{cm}^{-1}$  2921, 2851, 1561, 1403;  $^1\text{H}$  NMR (500 MHz, DMSO- $d_6$ )  $\delta$  1.24-1.37 (2H, m, 2  $\times$  CH), 1.49-1.62 (1H, m, CH), 1.76-1.93 (3H, m, 3  $\times$  CH), 3.66 (2H, dd,  $J = 2.2$  and 10.9 Hz, 2  $\times$  CH), 7.90 (8H, br s, 2  $\times$  NH $_4$ );  $^{13}\text{C}$  NMR (125 MHz, DMSO- $d_6$ )  $\delta$  23.9, 29.3, 77.9, 175.1; HRMS calcd. for C $_7$ H $_{10}$ O $_5$   $m/z$  [M+H] $^+$  173.0455, found 173.0459.

### 9-Oxa-3-azabicyclo[3.3.1]nonane-2,4-dione **7a**:

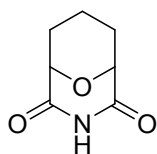

Prepared according to general procedure B starting from **6a** (150 mg, 0.72 mmol) furnishing **7a** as a white solid (85 mg, 0.55 mmol, 76%).  $R_f = 0.29$  (petrol:EtOAc, 60:40); mp: 149-157 °C; IR  $\nu_{\max}/\text{cm}^{-1}$  3077, 2958, 2925, 2852, 1702;  $^1\text{H NMR}$  (500 MHz, DMSO- $d_6$ )  $\delta$  1.35-1.50 (1H, m, CH), 1.66-1.77 (3H, m, 3  $\times$  CH), 1.84-1.94 (2H, m, 2  $\times$  CH), 4.45 (2H, dd,  $J = 1.0$  and 5.4 Hz, 2  $\times$  CH), 11.58 (1H, br s, NH);  $^{13}\text{C NMR}$  (125 MHz, DMSO- $d_6$ )  $\delta$  16.6, 26.0, 71.3, 173.7; HRMS calcd. for  $\text{C}_7\text{H}_9\text{NO}_3$   $m/z$   $[\text{M}+\text{H}]^+$  156.0655, found 156.0653.

### 9-Oxa-3-azabicyclo[3.3.1]nonane hydrochloride **2a**:

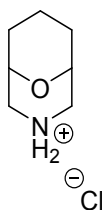

Prepared according to general procedure C with the following reagents: **7a** (585 mg, 3.77 mmol), THF (5 mL), 1 M  $\text{BH}_3$ -THF (15.1 mL, 15.1 mmol), MeOH (15 mL) and 1 M HCl in Et<sub>2</sub>O (30 mL), furnishing **2a** as a white solid (420 mg, 2.56 mmol, 68%).  $R_f = 0.16$  (DCM:MeOH, 80:20); mp: 242-250 °C; IR  $\nu_{\max}/\text{cm}^{-1}$  3092, 2753, 2637, 2494, 1591;  $^1\text{H NMR}$  (500 MHz, DMSO- $d_6$ )  $\delta$  1.56-1.69 (3H, m, 3  $\times$  CH), 1.89 (2H, heptet, 2  $\times$  CH), 2.00-2.16 (1H, m, CH), 3.19-3.22 (4H, m, 2  $\times$  CH<sub>2</sub>), 4.03 (2H, br s, 2  $\times$  CH), 8.28 (1H, br s, NH), 9.72 (1H, br s, NH);  $^{13}\text{C NMR}$  (125 MHz, DMSO- $d_6$ )  $\delta$  16.7, 27.7, 44.4, 63.8; HRMS calcd. for  $\text{C}_7\text{H}_{13}\text{NO}$   $m/z$   $[\text{M}+\text{H}]^+$  128.1070, found 128.1067.

### Diammonium (1*R*,3*S*)-cyclohexane-1,3-dicarboxylate **6b**:

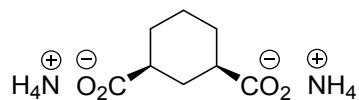

Prepared according to general procedure A with the following reagents: (1*R*,3*S*)-cyclohexane-1,3-dicarboxylic acid (2.5 g, 14.5 mmol) in water (10 mL) with 35% ammonium hydroxide in water (10 mL). Compound **6b** was a white solid (3.0 g, 14.5 mmol, 100%).  $R_f = 0.31$  (DCM:MeOH, 90:10); mp: 127-134 °C; IR  $\nu_{\max}/\text{cm}^{-1}$  2922, 1686;  $^1\text{H NMR}$  (500 MHz, DMSO- $d_6$ )  $\delta$  1.14-1.35 (4H, m, 4  $\times$  CH), 1.74-1.90 (3H, m, 3  $\times$  CH), 2.00-2.15 (3H, m, 3  $\times$  CH), 5.97

(8H, br s, 2 × NH<sub>4</sub>); <sup>13</sup>C NMR (125 MHz, DMSO-*d*<sub>6</sub>) δ 25.5 (CH<sub>2</sub>), 29.7 (CH<sub>2</sub>), 33.1, 44.2, 178.1; HRMS calcd. for C<sub>8</sub>H<sub>10</sub>O<sub>4</sub> *m/z* [M+H]<sup>+</sup> 171.0663, found 171.0667.

### 3-Azabicyclo[3.3.1]nonane-2,4-dione **7b**:

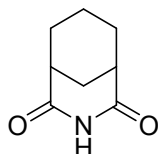

Prepared according to general procedure B from compound **6b** (950 mg, 4.61 mmol). **7b** was a white solid (489 mg, 3.20 mmol, 69%). *R*<sub>f</sub> = 0.63 (DCM:MeOH, 90:10); mp: 123-130 °C; IR *v*<sub>max</sub>/cm<sup>-1</sup> 2952, 2925, 1696; <sup>1</sup>H NMR (500 MHz, CDCl<sub>3</sub>) δ 1.40-1.51 (2H, m, 2 × CH), 1.60-1.75 (3H, m, 3 × CH), 1.92-1.99 (2H, m, 2 × CH), 2.13-2.20 (1H, m, CH), 7.73-7.78 (2H, m, 2 × CH), 7.84 (1H, br s, NH); <sup>13</sup>C NMR (125 MHz, CDCl<sub>3</sub>) δ 19.4, 27.9, 28.9, 37.7, 175.8; HRMS calcd. for C<sub>8</sub>H<sub>11</sub>NO<sub>2</sub> *m/z* [M+H]<sup>+</sup> 154.0863, found 154.0859.

### 3-Azabicyclo[3.3.1]nonane hydrochloride **2b**

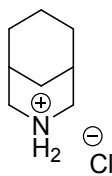

Prepared according to general procedure C with the following reagents: Compound **7b** (289 mg, 1.80 mmol), THF (3 mL), 1 M BH<sub>3</sub>-THF (7.5 mL, 7.5 mmol), MeOH (10 mL) and 1 M HCl in MeOH (10 mL) furnishing **2b** as a white solid (200 mg, 1.23 mmol, 69%). *R*<sub>f</sub> = 0.13 (MeOH); mp: 209-214 °C; IR *v*<sub>max</sub>/cm<sup>-1</sup> 2924, 2674, 1587, 1445; <sup>1</sup>H NMR (500 MHz, CDCl<sub>3</sub>) δ 1.50-1.79 (8H, m, 8 × CH), 1.86-2.00 (2H, m, 2 × CH), 3.03-3.12 (2H, m, 2 × CH), 3.17-3.23 (2H, m, 2 × CH), 7.67 (1H, br s, NH), 9.29 (1H, br s, NH); <sup>13</sup>C NMR (125 MHz, CDCl<sub>3</sub>) δ 19.9, 25.7, 29.2, 30.2, 47.3; HRMS calcd. for C<sub>8</sub>H<sub>16</sub>N *m/z* [M+H]<sup>+</sup> 126.1277, found 126.1277.

### Synthesis of (1*R*,5*S*,7*s*)-7-(benzyloxy)-9-oxa-3-azabicyclo[3.3.1]nonane-2,4-dione **8c**:

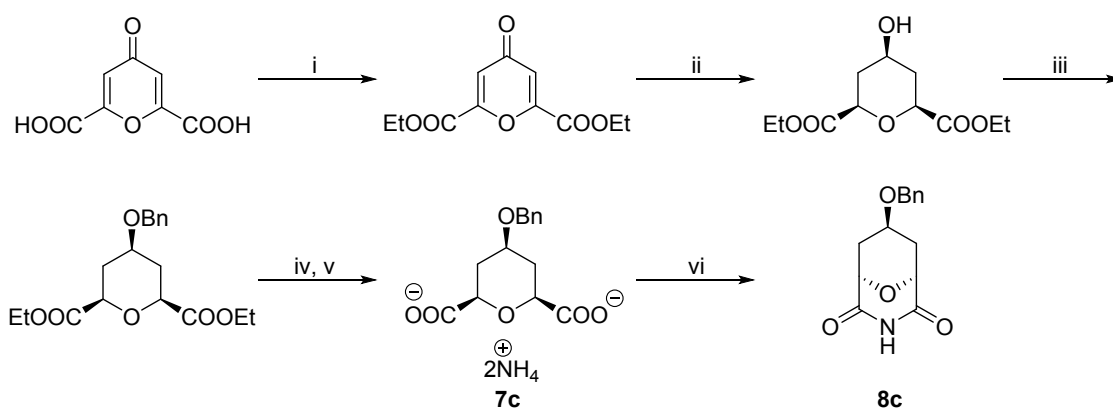

**Reagents and Conditions:** i)  $\text{H}_2\text{SO}_4$ , EtOH, RT, 48 h, 70%; ii)  $\text{H}_2$ , Pd/BaSO<sub>4</sub>, EtOH, RT, 20 h, 67%; iii) BnOC(NH)CCl<sub>3</sub>, TfOH, DCM:cyclohexane, RT, 24 h, 91%; iv) LiOH, THF, RT, 20 h, 100%; v)  $\text{NH}_4\text{OH}$ ,  $\text{H}_2\text{O}$ , RT, 100%; vi) 230 °C, 6 h, 37%.

### Diethyl 4-oxo-4H-pyran-2,6-dicarboxylate

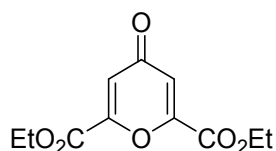

To a solution of 4-oxo-4H-pyran-2,6-dicarboxylic acid (1.54 g, 7.61 mmol) in ethanol (30 mL) at 0 °C was added conc. sulfuric acid (1.2 mL) dropwise over 5 min. The mixture was warmed to room temperature and then heated at reflux for 48 h. After cooling to RT, the solvent was removed *in vacuo* and the residue taken up into ethyl acetate (5 mL). Saturated sodium hydrogen carbonate was added until the aqueous layer pH was ~ 7. The aqueous layer was extracted with EtOAc (3 × 20 mL); the organic extracts were combined, dried over anhydrous MgSO<sub>4</sub> and the solvent was removed *in vacuo* to afford the title compound as an orange oil which was used directly (1.25 g, 5.2 mmol, 70%);  $R_f = 0.44$  (Petrol:EtOAc, 1:1);  $\lambda_{\text{max}}$  (EtOH/nm) 271; IR  $\nu_{\text{max}}/\text{cm}^{-1}$  3071, 2984, 1650; <sup>1</sup>H NMR (500 MHz, CDCl<sub>3</sub>)  $\delta$  1.40 (6H, t,  $J = 7.1$  Hz, 2 × CH<sub>3</sub>), 4.44 (4H, q,  $J = 7.1$  Hz, 2 × CH<sub>2</sub>), 7.10 (2H, s, 2 × CH); <sup>13</sup>C-NMR (125 MHz, CDCl<sub>3</sub>)  $\delta$  14.0, 63.2, 120.1, 153.0, 159.4, 177.1; HRMS calcd. for C<sub>11</sub>H<sub>12</sub>O<sub>6</sub>  $m/z$  [M+H]<sup>+</sup> 241.0707, found 241.0705.



### Diethyl (2*R*,4*s*,6*S*)-4-hydroxytetrahydro-2*H*-pyran-2,6-dicarboxylate

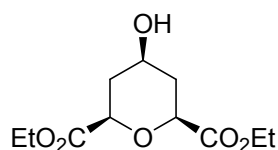

To diethyl 4-oxo-4*H*-pyran-2,6-dicarboxylate (1.4 g, 5.82 mmol) in ethanol (20 mL) was added a catalytic quantity of Pd/BaSO<sub>4</sub> and the mixture was placed under an atmosphere of hydrogen. After stirring for 20 h, the slurry was filtered through a pad of Celite, which was washed with ethanol (20 mL); the solvent was removed *in vacuo*. The crude product was purified by column chromatography (silica, elution with petrol:EtOAc, 1:1) to give the title compound as a colourless oil (0.98 g, 3.79 mmol, 67%);  $R_f = 0.17$  (PE:EA 1:1); IR  $\nu_{\max}/\text{cm}^{-1}$  3497, 3339, 2983, 1719; <sup>1</sup>H NMR (500 MHz, CDCl<sub>3</sub>)  $\delta$  1.28 (6H, t,  $J = 7.1$  Hz, 2  $\times$  CH<sub>3</sub>), 1.54 (2H, q,  $J = 12.0$  Hz, 2  $\times$  CH<sub>2</sub>), 2.22 -2.32 (2H, m, 2  $\times$  CH<sub>2</sub>), 2.39 (1H, br s, OH), 3.95 (1H, tt,  $J = 4.5$  and 10.9 Hz, CH), 4.01 (2H, dd,  $J = 2.0$  and 12.0 Hz, 2  $\times$  CH<sub>2</sub>), 4.22 (4H, q,  $J = 7.1$  Hz, 2  $\times$  CH<sub>2</sub>); <sup>13</sup>C NMR (125 MHz, CDCl<sub>3</sub>)  $\delta$  14.1, 37.2, 61.5, 67.2, 74.8, 169.7; HRMS calcd. for C<sub>11</sub>H<sub>18</sub>O<sub>6</sub>  $m/z$  [M+H]<sup>+</sup> 247.1176, found 247.1179.

### Diethyl (2*R*,4*s*,6*S*)-4-(benzyloxy)tetrahydro-2*H*-pyran-2,6-dicarboxylate<sup>3</sup>

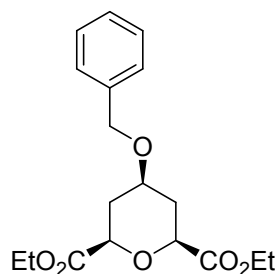

Diethyl (2*R*,4*s*,6*S*)-4-hydroxytetrahydro-2*H*-pyran-2,6-dicarboxylate (1.3 g, 5.3 mmol) was dissolved in DCM (11 mL) and cyclohexane (11 mL). Benzyl trichloroacetamidate (1.09 mL, 5.83 mmol) was introduced dropwise followed by TFA (56  $\mu$ L) in DCM (0.5 mL). After 15 h, more benzyl trichloroacetamidate (0.55 mL, 2.92 mmol) was added with TFA (38  $\mu$ L) in DCM (0.5 mL). After a further 4 h at RT, the solvent was removed *in vacuo* and the crude product was purified by MPLC (elution with petrol:EtOAc, 70:30) affording the title compound as a colourless oil (1.6 g, 4.8 mmol, 91%);  $R_f = 0.53$  (petrol:EtOAc, 1:1); IR (neat)  $\nu_{\max}/\text{cm}^{-1}$  1734; <sup>1</sup>H NMR (500 MHz, CDCl<sub>3</sub>)  $\delta$  1.23 (6H, t,  $J = 7.2$  Hz, 2  $\times$  CH<sub>3</sub>), 1.55 (2H, q,  $J = 12.2$  Hz, 2  $\times$  CH), 2.32-2.39 (2H, m, 2  $\times$  CH), 3.61 (1H, tt,  $J = 4.4$  Hz and 10.9 Hz, CH), 4.18 (4H, q,  $J =$

7.2 Hz, 2 × CH<sub>2</sub>), 4.54 (2H, s, CH<sub>2</sub>), 7.20-7.32 (5H, m, 5 × H-Ar); <sup>13</sup>C NMR (125 MHz, CDCl<sub>3</sub>) δ 14.3, 34.6, 61.6, 69.9, 73.4, 75.0, 127.6, 127.9, 128.6, 138.0, 169.7; HRMS calcd. for C<sub>18</sub>H<sub>24</sub>O<sub>6</sub> *m/z* [M+H]<sup>+</sup> 354.1911, found 354.1915.

**(2*R*,4*s*,6*S*)-4-(Benzyloxy)tetrahydro-2*H*-pyran-2,6-dicarboxylic acid 6c:**

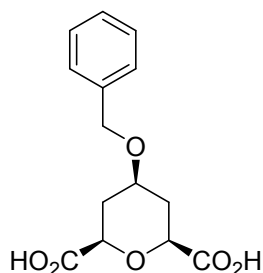

To diethyl (2*R*,4*s*,6*S*)-4-(benzyloxy)tetrahydro-2*H*-pyran-2,6-dicarboxylate (218 mg, 0.60 mmol) in THF (6.5 mL) was added 2 M LiOH in water (4.5 mL, 8.9 mmol) and the mixture was stirred at room temperature for 28 h. The solvent was removed *in vacuo* and the residue taken up in EtOAc (5 mL), H<sub>2</sub>O (2 mL) was added and the pH of the aqueous layer was adjusted to 2 with 2M HCl. The product was extracted with EtOAc (3 × 15 mL), the organic extracts were combined and dried (MgSO<sub>4</sub>), and the solvent was removed *in vacuo* to afford the title compound as a white solid (180 mg, 0.64 mmol, 100%); R<sub>f</sub> = 0.27 (DCM:MeOH, 50:50); mp 165-172 °C; IR (neat)  $\nu_{\text{max}}/\text{cm}^{-1}$  3247, 1765, 1711; <sup>1</sup>H NMR (500 MHz, DMSO-*d*<sub>6</sub>) δ 1.30 (2H, q, *J* = 12.2 Hz, 2 × CH), 2.25-2.30 (2H, m, 2 × CH), 3.74 (1H, tt, *J* = 4.4 Hz and 10.9 Hz, CH), 4.02 (2H, dd, *J* = 1.9 and 12.3 Hz, 2 × CH), 4.57 (2H, s, CH<sub>2</sub>), 7.25-7.40 (5H, m, 5 × H-Ar), 12.75 (2H, br s, OH); <sup>13</sup>C NMR (125 MHz, DMSO-*d*<sub>6</sub>) δ 39.9, 69.3, 73.4, 74.0, 127.8, 127.9, 128.7, 139.2, 171.7; HRMS calcd. for C<sub>14</sub>H<sub>16</sub>O<sub>6</sub> *m/z* [M-H]<sup>-</sup> 279.0874, found 279.0876.

**Diammonium (2*R*,4*s*,6*S*)-4-(benzyloxy)tetrahydro-2*H*-pyran-2,6-dicarboxylate 7c:**

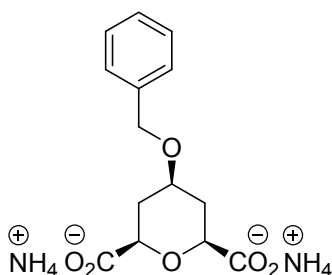

(2*R*,4*s*,6*S*)-4-(Benzyloxy)tetrahydro-2*H*-pyran-2,6-dicarboxylic acid (700 mg, 2.5 mmol) was solubilised in water (3.5 mL) and **35% ammonium hydroxide in water** (3.5 mL) was added dropwise. After stirring for 3 h at RT, the solvent was removed *in vacuo* and by freeze drying, to afford the title compound as a white solid (750 mg, 2.5 mmol, 100%);  $R_f = 0.37$  (DCM:MeOH, 50:50); mp 234-238 °C; IR (neat)  $\nu_{\max}/\text{cm}^{-1}$  3199, 1574;  $^1\text{H NMR}$  (500 MHz, DMSO-*d*<sub>6</sub>)  $\delta$  1.14 (2H, q,  $J = 11.8$  Hz, 2 × CH), 2.31-2.37 (2H, m, 2 × CH), 3.51-3.63 (3H, m, CH and 2 × CH), 4.59 (2H, s, CH<sub>2</sub>), 7.20-7.44 (5H, m, 5 × H-Ar), 7.82 (8H, br s, NH);  $^{13}\text{C NMR}$  (125 MHz, DMSO-*d*<sub>6</sub>)  $\delta$  36.5, 69.0, 75.6, 76.4, 127.7, 127.8, 128.7, 139.6, 175.1; HRMS calcd. for C<sub>14</sub>H<sub>22</sub>N<sub>2</sub>O<sub>6</sub>  $m/z$  279.0874 [M-H]<sup>-</sup>, found 279.0876.

**(1*R*,5*S*,7*s*)-7-(benzyloxy)-9-oxa-3-azabicyclo[3.3.1]nonane-2,4-dione 8c:**

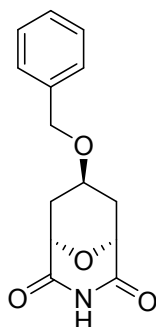

(1*R*,5*S*,7*s*)-7-(benzyloxy)-9-oxa-3-azabicyclo[3.3.1]nonane-2,4-dione was synthesised according to general procedure B, using: diammonium (2*R*,4*s*,6*S*)-4-(benzyloxy)tetrahydro-2*H*-pyran-2,6-dicarboxylate (300 mg, 0.90 mmol) and purification by MPLC (petrol:EtOAc, 70:30) to afford the title compound as a white solid (83 mg, 0.32 mmol, 35%);  $R_f = 0.57$  (EtOAc); mp 164-169 °C; IR (neat)  $\nu_{\max}/\text{cm}^{-1}$  3178, 1698;  $^1\text{H NMR}$  (500 MHz, CDCl<sub>3</sub>) 2.07 (2H, dq,  $J = 3.3$  and 14.5 Hz, 2 × CH), 2.21-2.34 (2H, m, 2 × CH), 3.78 (1H, pen,  $J = 2.7$  Hz, CH), 4.33 (2H, s, CH<sub>2</sub>), 4.41 (2H, d,  $J = 6.1$  Hz, 2 × CH), 7.12-7.30 (5H, m, 5 × H-Ar), 7.87 (1H, bs, NH);  $^{13}\text{C NMR}$  (125 MHz, CDCl<sub>3</sub>)  $\delta$  29.9, 68.6, 69.4, 70.0, 126.3, 126.7, 127.4, 136.3, 171.6; HRMS calcd. for C<sub>14</sub>H<sub>15</sub>NO<sub>4</sub>  $m/z$  279.1339 [M+H]<sup>+</sup>, found 279.1344.

*References*

1. A.C. Cope and A. Fournier, *J. Am. Chem. Soc.*, 1957, **79**, 3896.
2. E. E. Blaise and H. Gault, *Bull. Soc. Chim. Fr.*, 1907, 4.
3. B. Schmidt, *Heterocycles*, 1999, **51**, 179.

**Table 1:** Crystal data and structure refinement for **6a**.

|                                             |                                                               |
|---------------------------------------------|---------------------------------------------------------------|
| Empirical formula                           | C <sub>7</sub> H <sub>13</sub> NO <sub>5</sub>                |
| Formula weight                              | 191.18                                                        |
| Temperature/K                               | 150.0(2)                                                      |
| Crystal system                              | triclinic                                                     |
| Space group                                 | P-1                                                           |
| a/Å                                         | 6.9141(2)                                                     |
| b/Å                                         | 9.3897(3)                                                     |
| c/Å                                         | 14.4781(5)                                                    |
| α/°                                         | 101.468(3)                                                    |
| β/°                                         | 96.993(3)                                                     |
| γ/°                                         | 98.349(3)                                                     |
| Volume/Å <sup>3</sup>                       | 900.34(5)                                                     |
| Z                                           | 4                                                             |
| ρ <sub>calc</sub> /g/cm <sup>3</sup>        | 1.410                                                         |
| μ/mm <sup>-1</sup>                          | 1.036                                                         |
| F(000)                                      | 408.0                                                         |
| Crystal size/mm <sup>3</sup>                | 0.15 × 0.11 × 0.08                                            |
| Radiation                                   | CuKα (λ = 1.54184)                                            |
| 2θ range for data collection/°              | 6.306 to 133.746                                              |
| Index ranges                                | -8 ≤ h ≤ 8, -11 ≤ k ≤ 11, -16 ≤ l ≤ 14                        |
| Reflections collected                       | 12629                                                         |
| Independent reflections                     | 3184 [R <sub>int</sub> = 0.0253, R <sub>sigma</sub> = 0.0180] |
| Data/restraints/parameters                  | 3184/2/275                                                    |
| Goodness-of-fit on F <sup>2</sup>           | 1.038                                                         |
| Final R indexes [I ≥ 2σ (I)]                | R <sub>1</sub> = 0.0312, wR <sub>2</sub> = 0.0817             |
| Final R indexes [all data]                  | R <sub>1</sub> = 0.0345, wR <sub>2</sub> = 0.0843             |
| Largest diff. peak/hole / e Å <sup>-3</sup> | 0.26/-0.24                                                    |

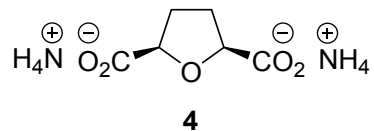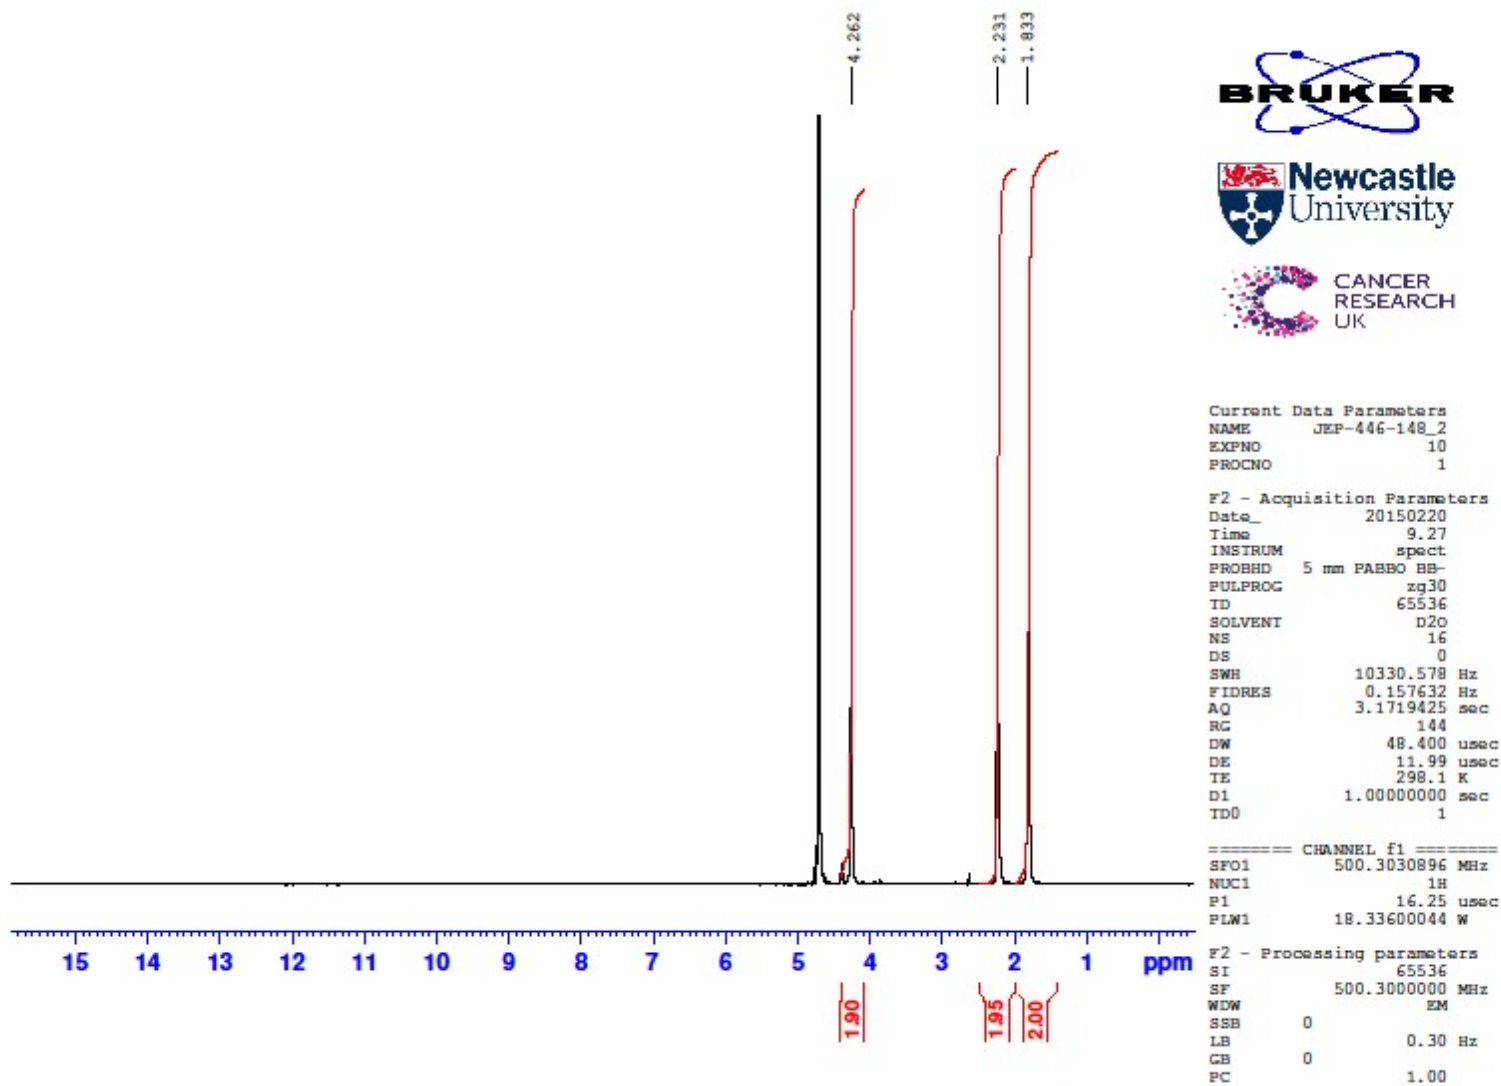

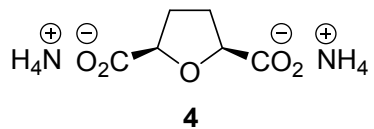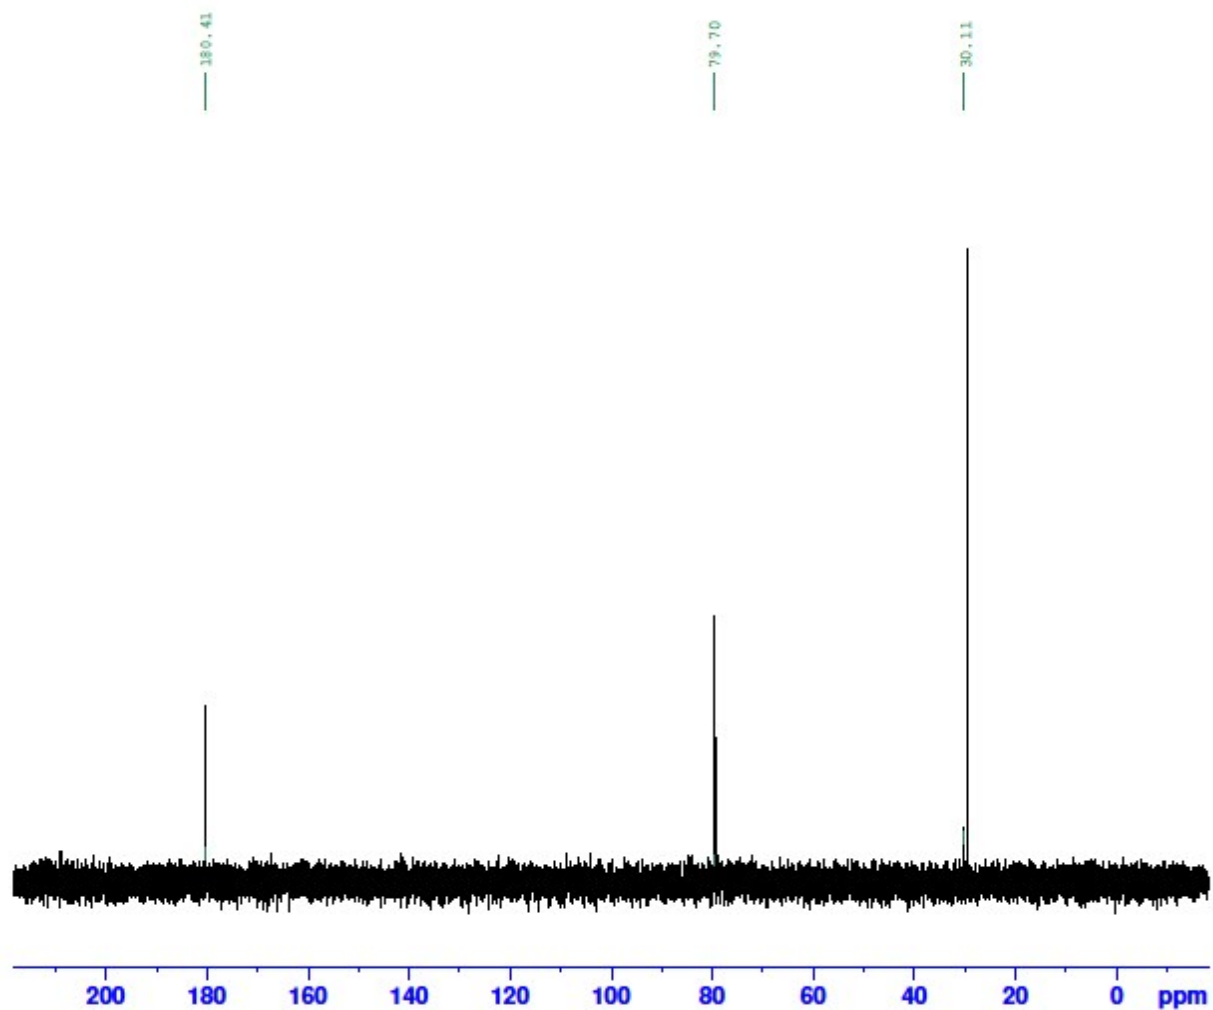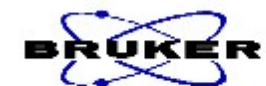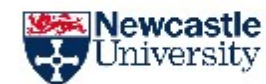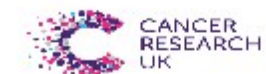

Current Data Parameters  
 NAME JEP-446-148\_2  
 EXPNO 11  
 PROCNO 1

F2 - Acquisition Parameters  
 Date\_ 20150220  
 Time 9.44  
 INSTRUM spect  
 PROBHD 5 mm PABBO BB-  
 PULPROG zgpg30  
 TD 65536  
 SOLVENT D2O  
 NS 256  
 DS 2  
 SWH 29761.904 Hz  
 FIDRES 0.454131 Hz  
 AQ 1.1010048 sec  
 RC 456  
 DW 16.800 usec  
 DE 7.68 usec  
 TE 298.1 K  
 D1 2.0000000 sec  
 D11 0.0300000 sec  
 TD0 1

----- CHANNEL f1 -----  
 SFO1 125.8131151 MHz  
 NUC1 13C  
 P1 9.75 usec  
 PLW1 82.38999939 W

----- CHANNEL f2 -----  
 SFO2 500.3020012 MHz  
 NUC2 1H  
 CPDPRG2 waltr16  
 PCPD2 80.00 usec  
 PLW2 18.33600044 W  
 PLW12 0.75654000 W  
 PLW13 0.48418999 W

F2 - Processing parameters  
 SI 65536  
 SF 125.8005350 MHz  
 WDW EM  
 SSB 0  
 LB 1.00 Hz  
 GB 0  
 PC 1.40

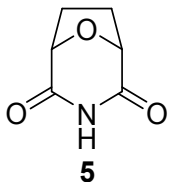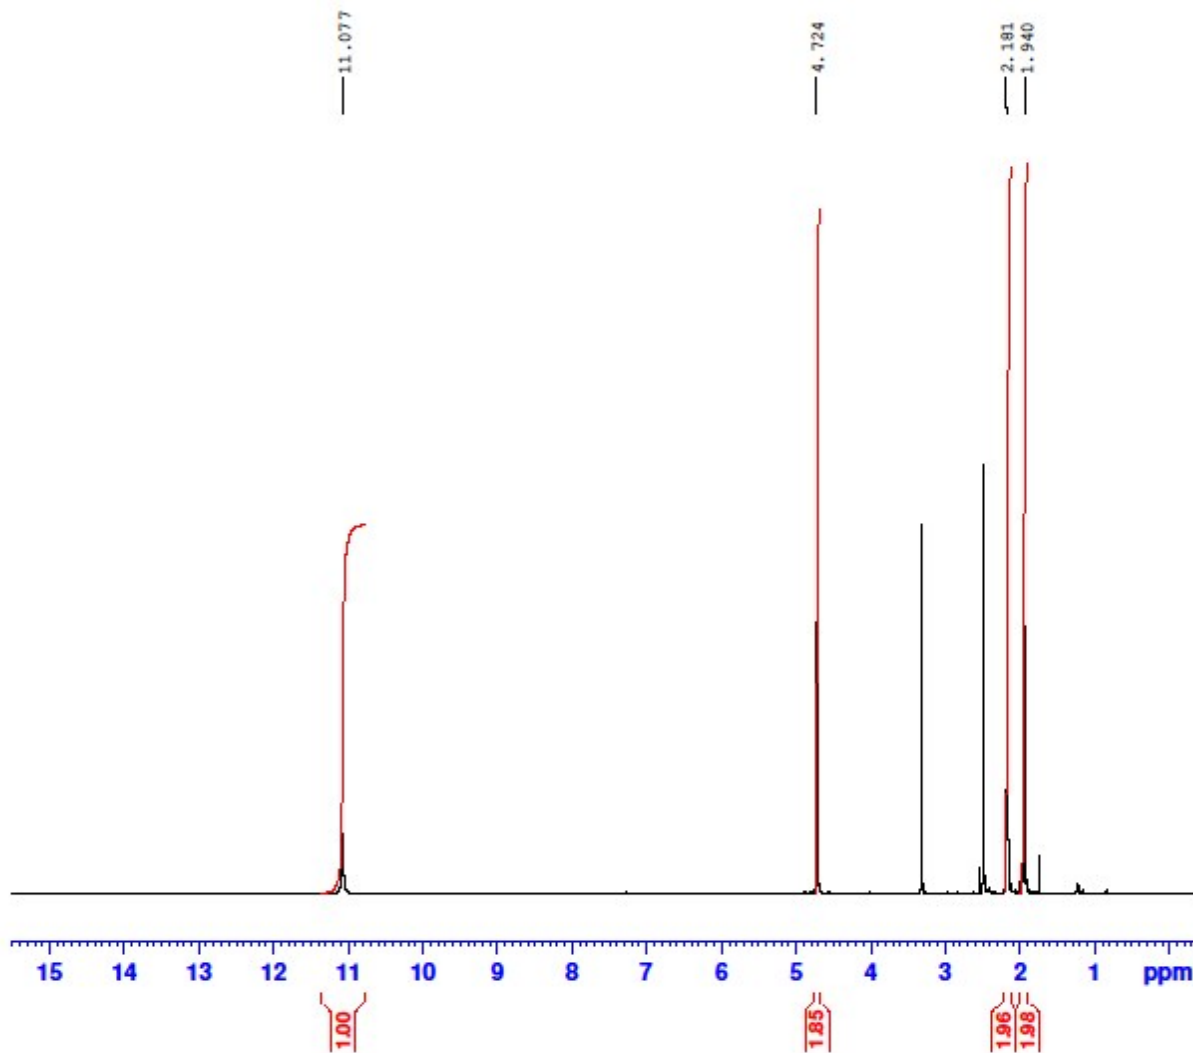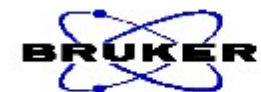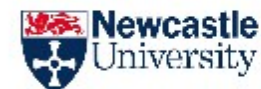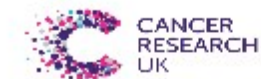

Current Data Parameters  
 NAME JEP-446-036PURE  
 EXPNO 10  
 PROCNO 1

F2 - Acquisition Parameters  
 Date\_ 20121114  
 Time 16.37  
 INSTRUM spect  
 PROBHD 5 mm PABBO BB-  
 PULPROG zg30  
 TD 65536  
 SOLVENT DMSO  
 NS 16  
 DS 0  
 SWH 10330.578 Hz  
 FIDRES 0.157632 Hz  
 AQ 3.1719425 sec  
 RC 406  
 DW 48.400 usec  
 DE 12.35 usec  
 TE 295.0 K  
 D1 1.00000000 sec  
 TD0 1

==== CHANNEL f1 =====  
 NUC1 1H  
 P1 14.50 usec  
 PL1 1.00 dB  
 PL1W 18.33646011 W  
 SFO1 500.3030896 MHz

F2 - Processing parameters  
 SI 65536  
 SF 500.3000116 MHz  
 WDW EM  
 SSB 0  
 LB 0.30 Hz  
 GB 0  
 PC 1.00

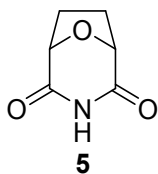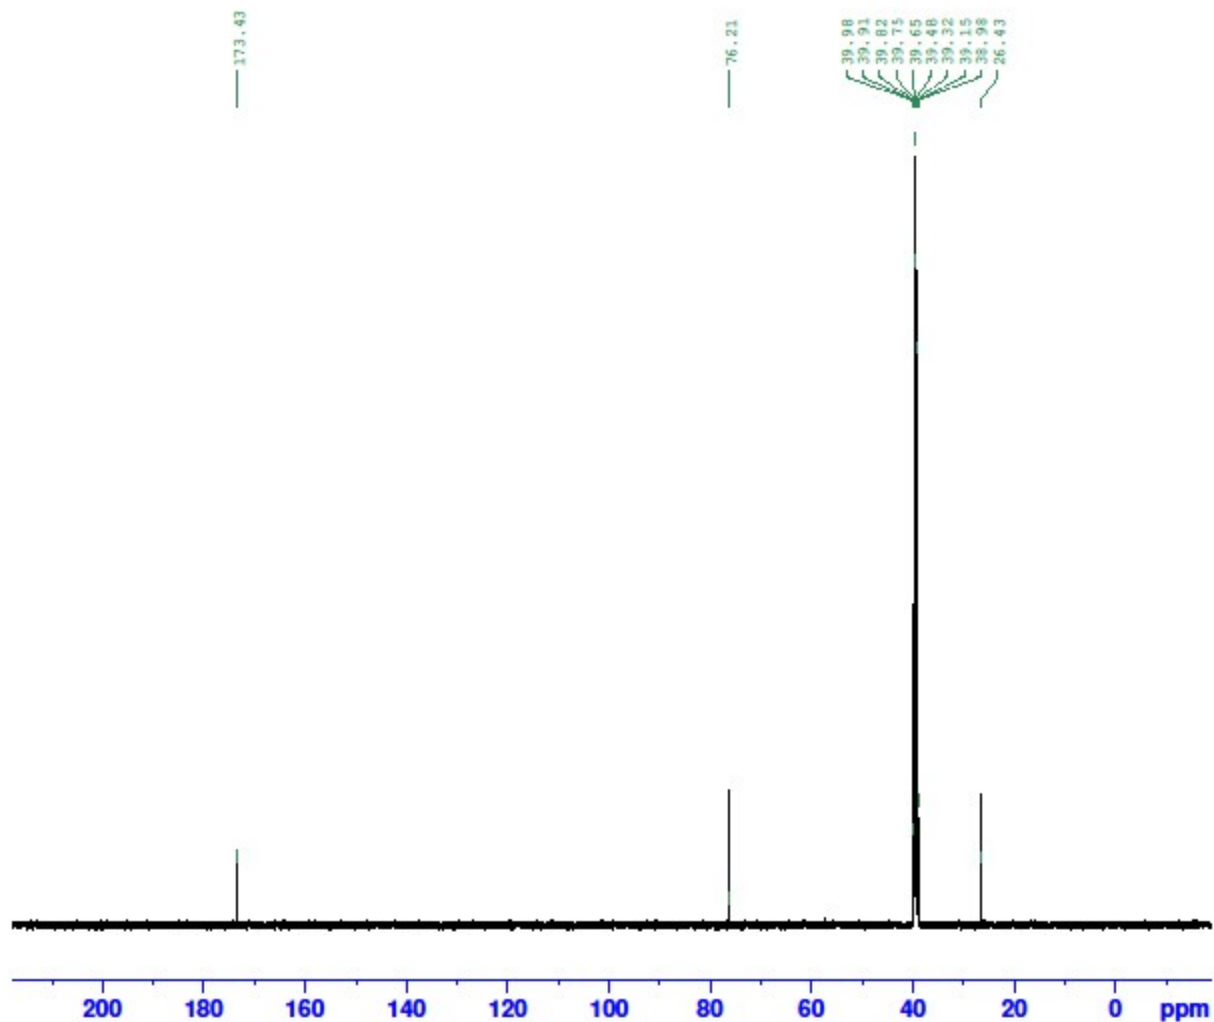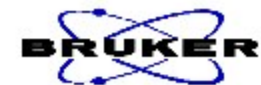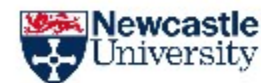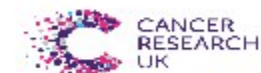

Current Data Parameters  
 NAME JKP-446-036PUNE  
 EXPNO 11  
 PROCNO 1

F2 - Acquisition Parameters  
 Date\_ 20121114  
 Time 17.14  
 INSTRUM spect  
 PROBRD 5 mm PABBO BB-  
 PULPROG zgpg30  
 TD 65536  
 SOLVENT DMSO  
 NS 256  
 DS 2  
 SWH 29761.904 Hz  
 FIDRES 0.454131 Hz  
 AQ 1.1010048 sec  
 RG 456  
 DW 16.800 usec  
 DE 7.68 usec  
 TE 295.9 K  
 D1 2.0000000 sec  
 D11 0.0300000 sec  
 TDO 1

CHANNEL f1  
 NUC1 13C  
 P1 9.75 usec  
 PL1 0 dB  
 PL1W 82.38987732 W  
 SFO1 125.8131151 MHz

CHANNEL f2  
 CPDPRG2 waltz16  
 NUC2 1H  
 PCPD2 80.00 usec  
 PL2 1.00 dB  
 PL12 17.00 dB  
 PL13 21.00 dB  
 PL2W 18.33646011 W  
 PL12W 0.46059108 W  
 PL13W 0.18336460 W  
 SFO2 500.3020012 MHz

F2 - Processing parameters  
 SI 65536  
 SF 125.8005979 MHz  
 WDW EM  
 SSB 0  
 LB 1.00 Hz  
 GB 0  
 PC 1.40



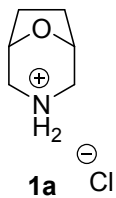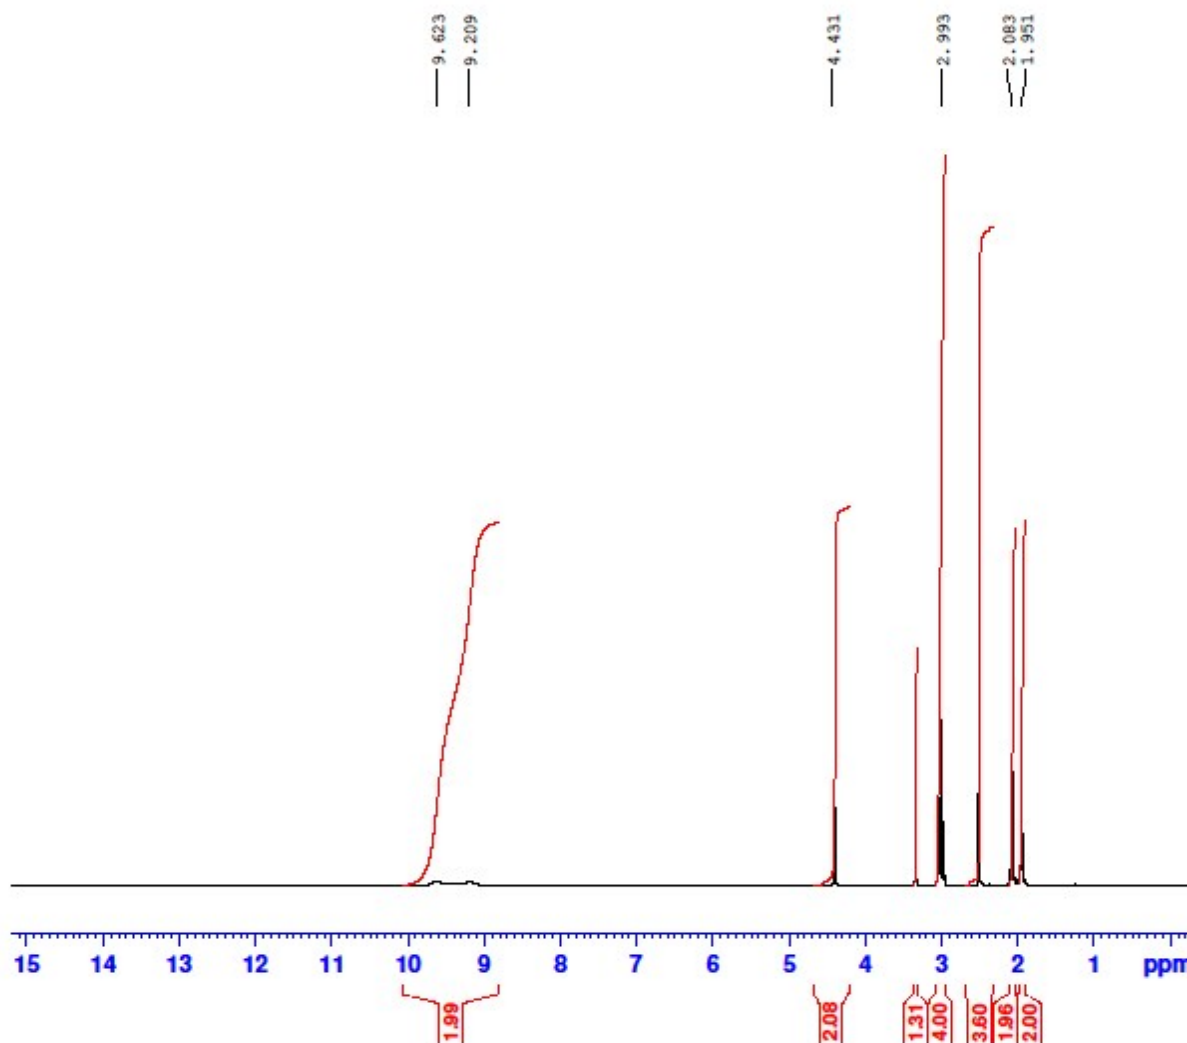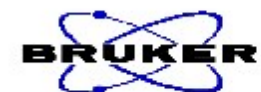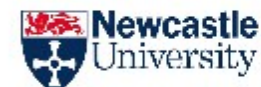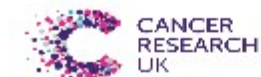

Current Data Parameters  
 NAME Andreys HAT-morpholine  
 EXPNO 10  
 PROCNO 1

F2 - Acquisition Parameters  
 Date\_ 20121220  
 Time 13.45  
 INSTRUM spect  
 PROBHD 5 mm PABBO BB-  
 PULPROG zg30  
 ID 65536  
 SOLVENT DMSO  
 NS 16  
 DS 0  
 SWH 10330.578 Hz  
 FIDRES 0.157632 Hz  
 AQ 3.1719425 sec  
 RG 362  
 DW 48.400 usec  
 DK 12.35 usec  
 TK 297.0 K  
 D1 1.00000000 sec  
 TDO 1

----- CHANNEL f1 -----  
 NUC1 1H  
 P1 14.50 usec  
 PL1 1.00 dB  
 PL1W 18.33646011 W  
 SFO1 500.3030896 MHz

F2 - Processing parameters  
 SI 65536  
 SF 500.3000000 MHz  
 WDW EM  
 SSB 0  
 LB 0.30 Hz  
 GB 0  
 PC 1.00

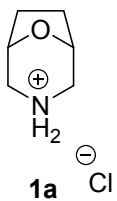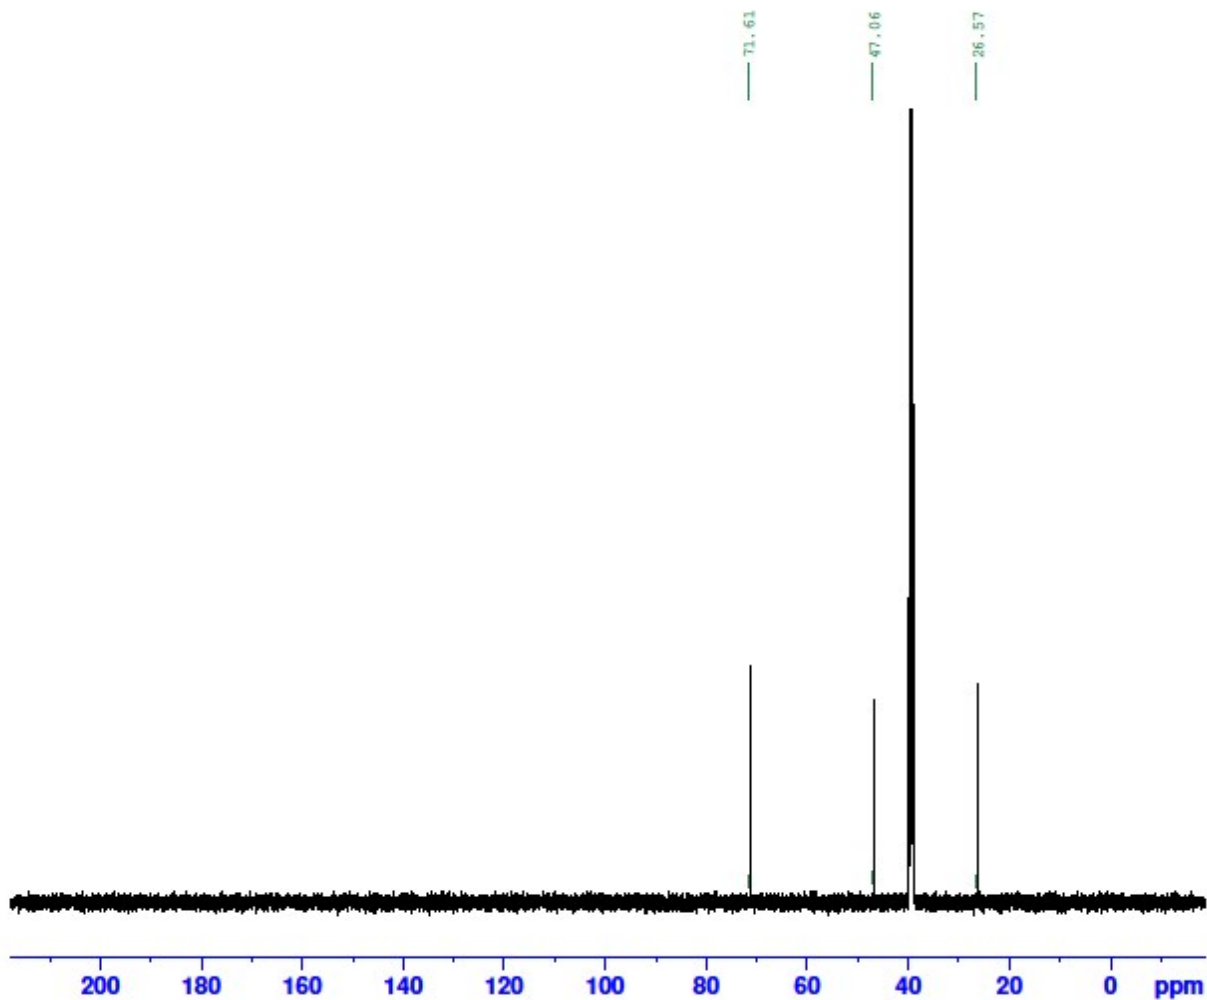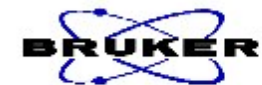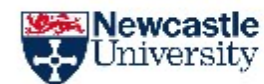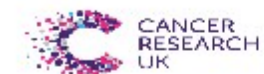

Current Data Parameters  
 NAME Andrya NAT-morpholine  
 EXPNO 20  
 PROCNO 1

F2 - Acquisition Parameters  
 Date\_ 20121220  
 Time 14.12  
 INSTRUM spect  
 PROBRD 5 mm PABBO BB-  
 PULPROG zgpg30  
 TD 65536  
 SOLVENT DMSO  
 NS 256  
 DS 2  
 SWS 29761.904 Hz  
 FIDRES 0.454131 Hz  
 AQ 1.1010048 sec  
 RG 575  
 DW 16.800 usec  
 DE 7.68 usec  
 TE 297.0 K  
 D1 2.00000000 sec  
 D11 0.03000000 sec  
 TD0 1

CHANNEL f1  
 NU01 13c  
 P1 9.75 usec  
 PL1 0 db  
 PL1W 82.38987732 W  
 SFO1 125.8131151 MHz

CHANNEL f2  
 CPDPRG2 waltz16  
 NU02 1H  
 PCPD2 80.00 usec  
 PL2 1.00 db  
 PL12 17.00 db  
 PL13 21.00 db  
 PL2W 18.33646011 W  
 PL12W 0.46059108 W  
 PL13W 0.18336460 W  
 SFO2 500.3020012 MHz

F2 - Processing parameters  
 SI 65536  
 SF 125.8005979 MHz  
 MSB 0  
 SSB 1.00 Hz  
 GB 0  
 PC 1.40

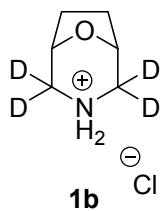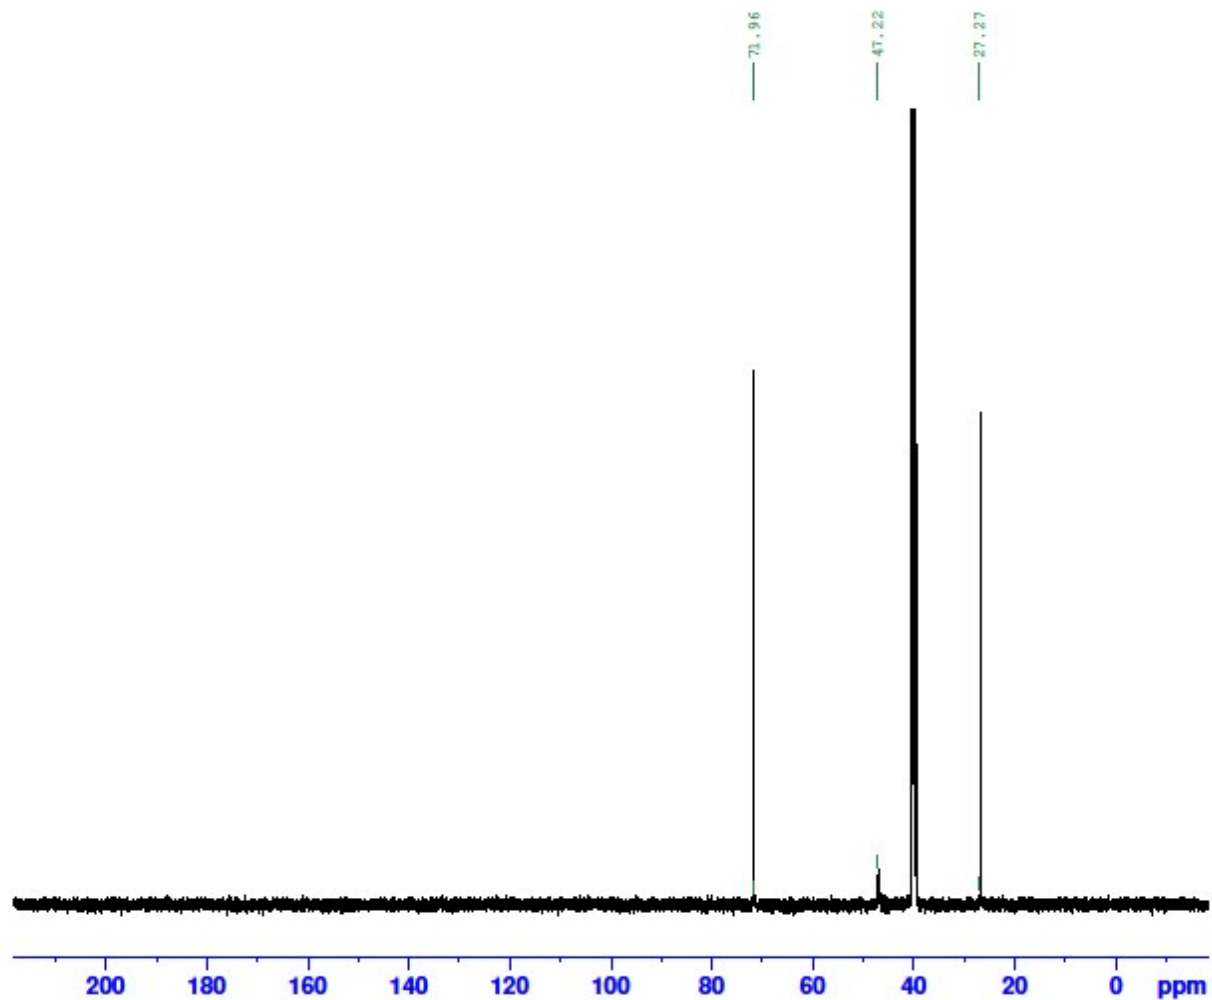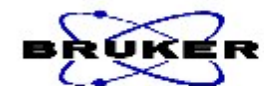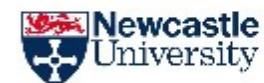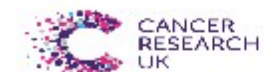

Current Data Parameters  
 NAME JEP-489-046  
 EXPNO 120  
 PROCNO 1

F2 - Acquisition Parameters  
 Date\_ 20141006  
 Time 22.25  
 INSTRUM spect  
 PROBHD 5 mm PABBO BB-  
 PULPROG zgpg  
 ID 41662  
 SOLVENT DMSO  
 NS 2656  
 DS 2  
 SWH 29761.904 Hz  
 FIDRES 0.714366 Hz  
 AQ 0.6999216 sec  
 RC 575  
 DW 16.800 usec  
 DE 7.72 usec  
 TE 298.0 K  
 D1 5.0000000 sec  
 D11 0.0300000 sec  
 TD0 1

----- CHANNEL f1 -----  
 SFO1 125.8131151 MHz  
 NUC1 13C  
 P1 9.75 usec  
 PLW1 82.38999939 W

----- CHANNEL f2 -----  
 SFO2 500.3020012 MHz  
 NUC2 1H  
 CPDPRG[2] waltz16  
 PCPD2 80.00 usec  
 PLW2 18.33600044 W  
 PLW12 0.75654000 W  
 PLW13 0.48418999 W

F2 - Processing parameters  
 SI 65536  
 SF 125.8005350 MHz  
 WMW EM  
 SSB 0  
 LB 1.00 Hz  
 GB 0  
 PC 1.40

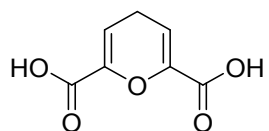

JEP-489-058

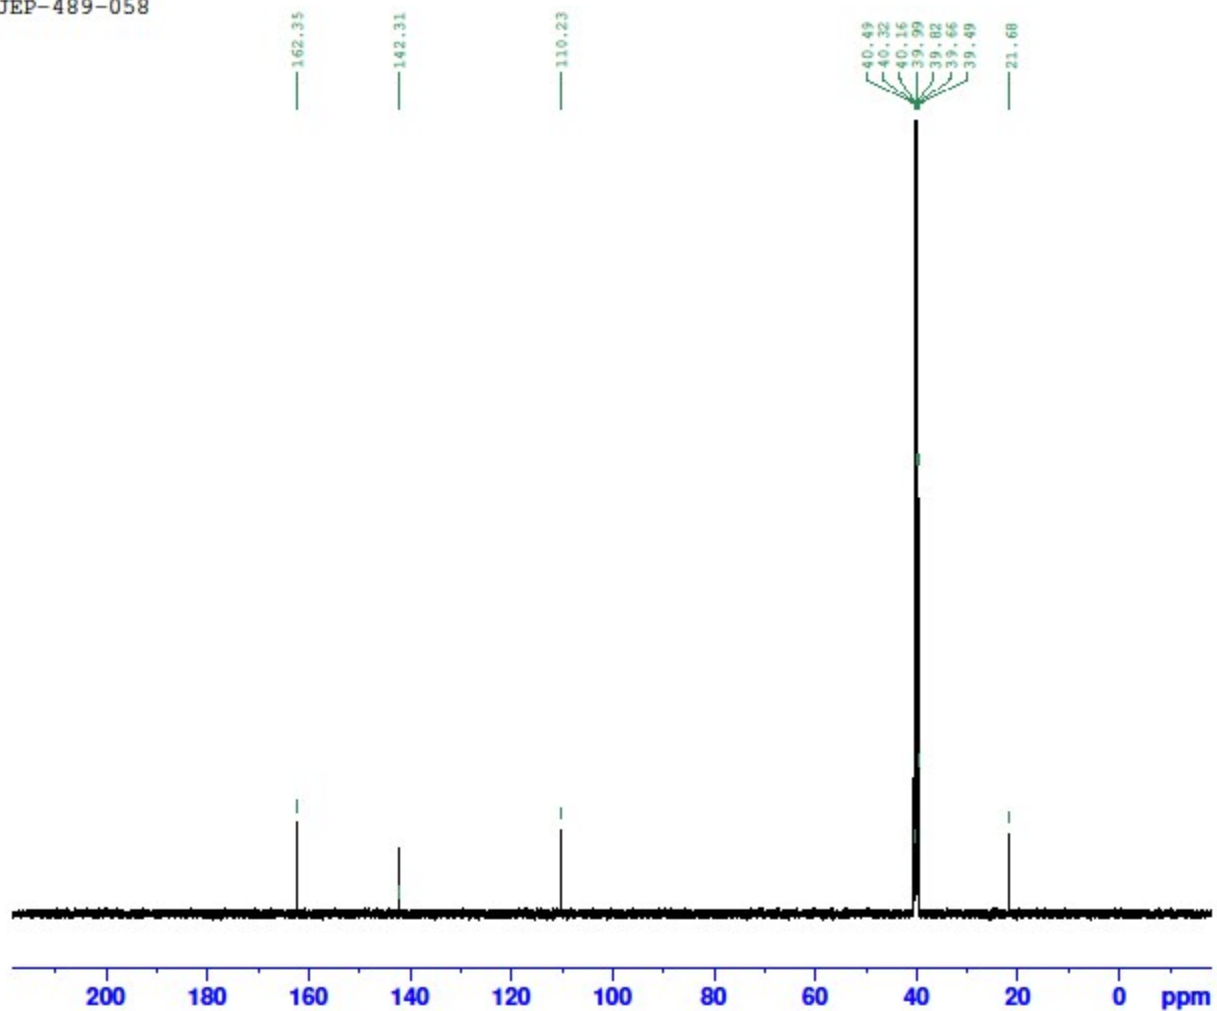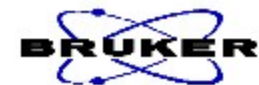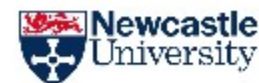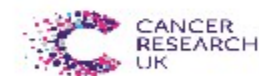

Current Data Parameters  
 NAME JEP-489-058  
 EXPNO 41  
 PROCNO 1

F2 - Acquisition Parameters  
 Date\_ 20140820  
 Time 14.47  
 INSTRUM spect  
 PROBHD 5 mm PABBO BB-  
 PULPROG zgpg30  
 TD 6536  
 SOLVENT DMSO  
 NS 256  
 DS 2  
 SWH 29761.904 Hz  
 FIDRES 0.454131 Hz  
 AQ 1.1010048 sec  
 RG 724  
 LW 16.800 usec  
 DE 7.68 usec  
 TE 298.0 K  
 D1 2.0000000 sec  
 D11 0.0300000 sec  
 TD0 1

----- CHANNEL f1 -----  
 SFO1 125.8131151 MHz  
 NUC1 13C  
 P1 9.75 usec  
 PLW1 82.38999939 W

----- CHANNEL f2 -----  
 SFO2 500.3020012 MHz  
 NUC2 1H  
 CPDPRG2 waltz16  
 PCPD2 80.00 usec  
 PLW2 18.33600044 W  
 PLW12 0.75654000 W  
 PLW13 0.48418999 W

F2 - Processing parameters  
 SI 6536  
 SF 125.8005350 MHz  
 WDW EM  
 SSB 0  
 LB 1.00 Hz  
 GB 0  
 PC 1.40

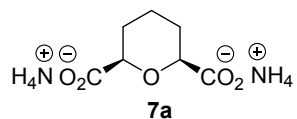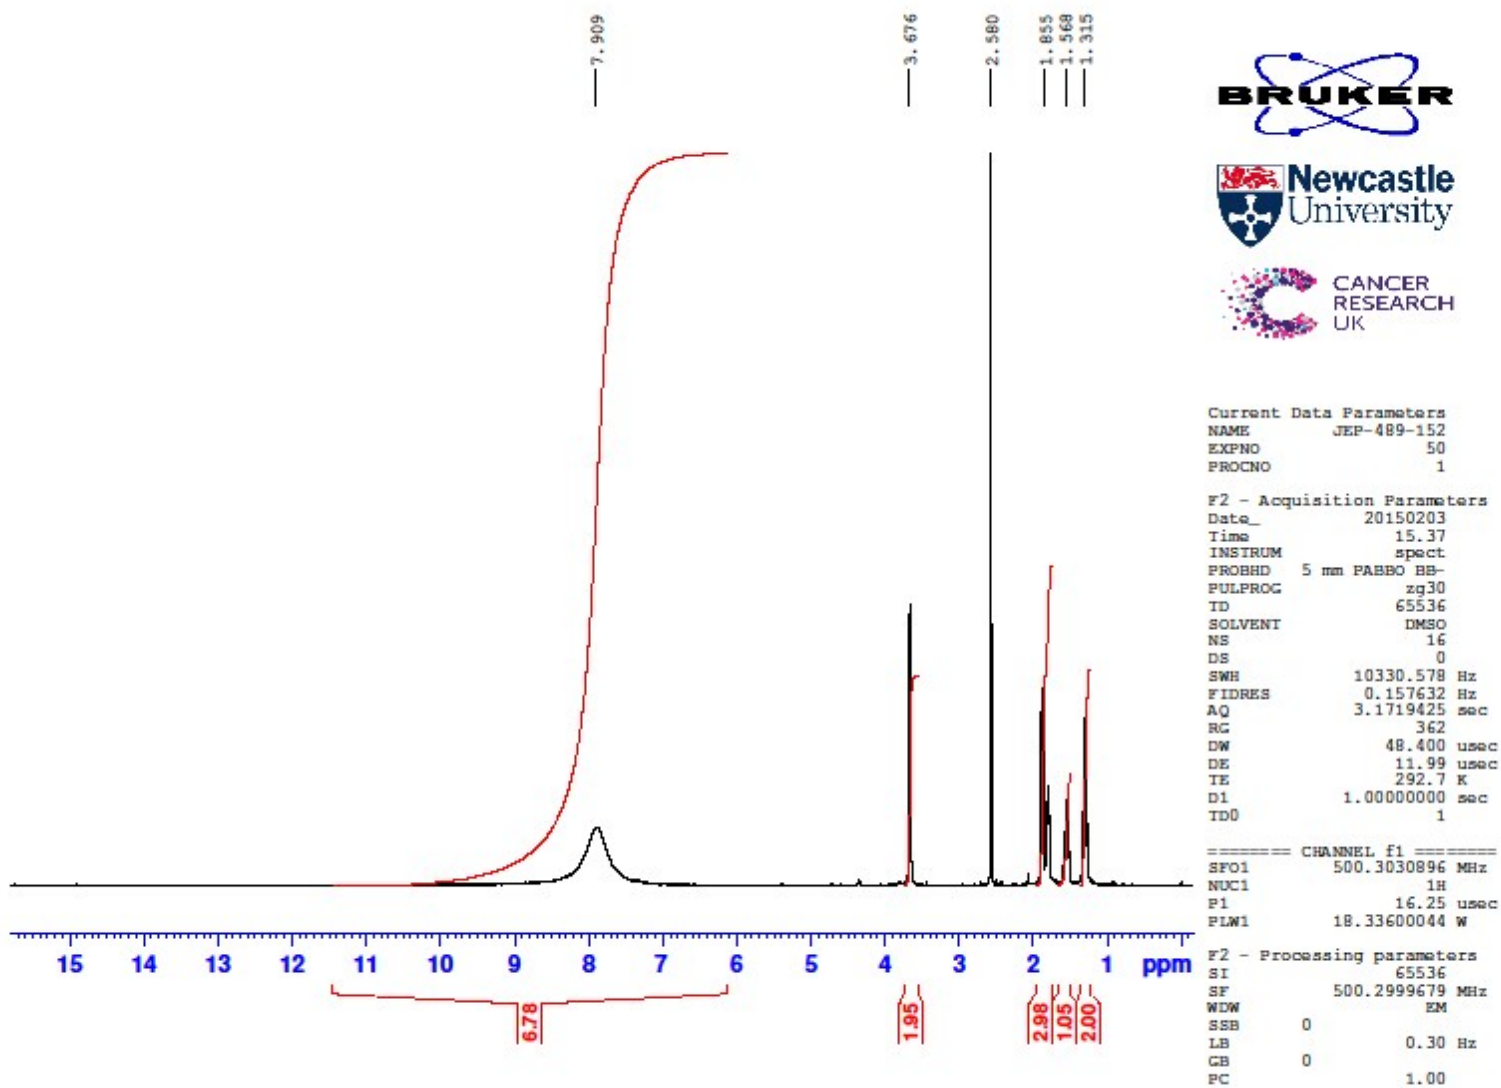

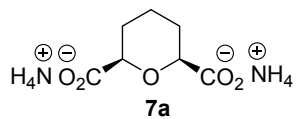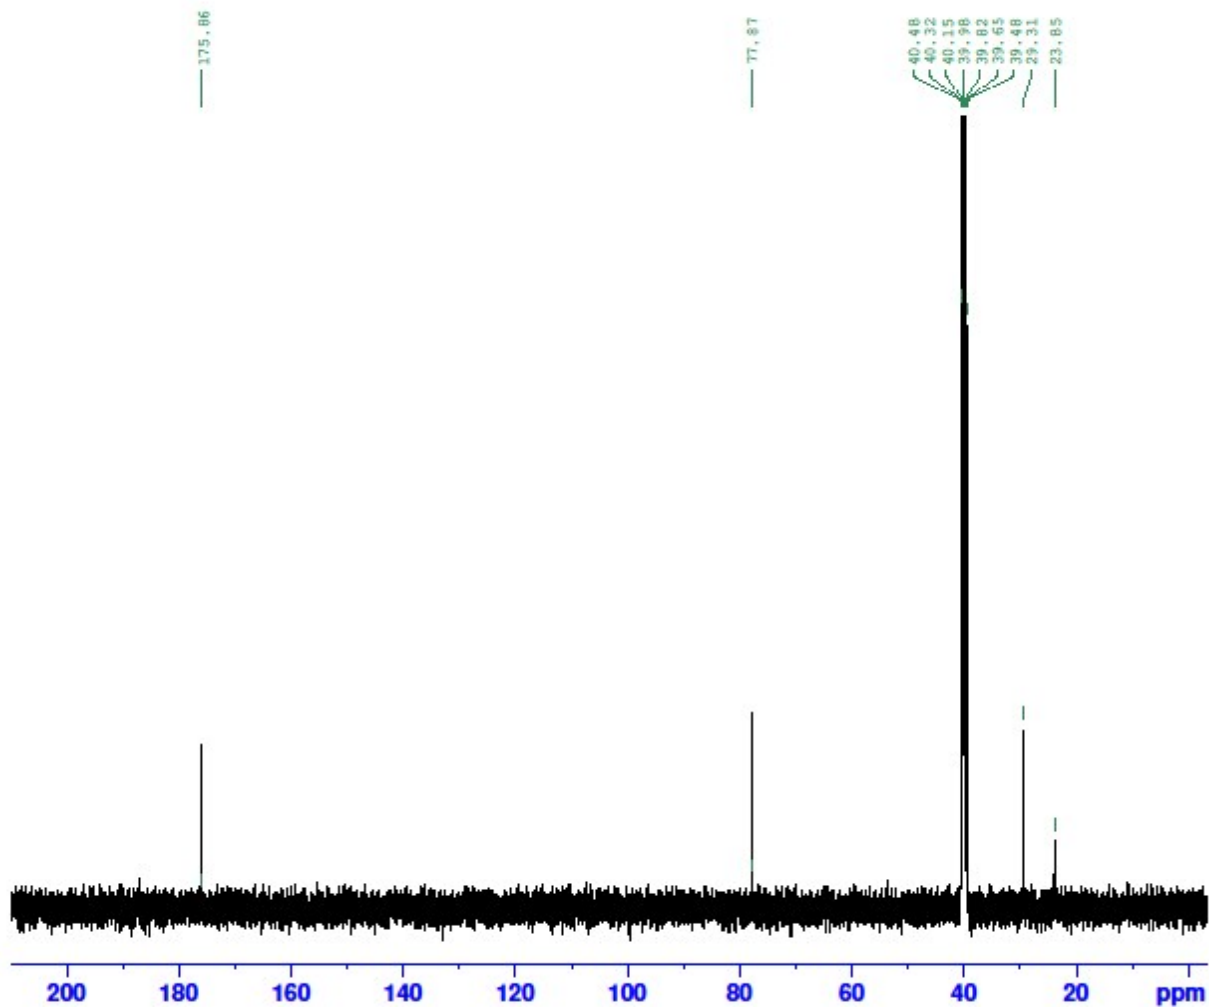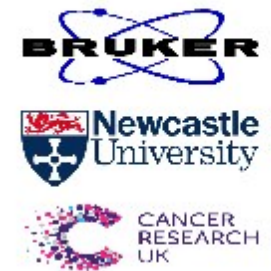

Current Data Parameters  
NAME JEP-489-152  
EXPNO 51  
PROCNO 1

F2 - Acquisition Parameters  
Date\_ 20150203  
Time 16.24  
INSTRUM spect  
PROBHD 5 mm PABBO BB-  
PULPROG zgpg30  
TD 65536  
SOLVENT DMSO  
NS 256  
DS 2  
SWH 29761.904 Hz  
FIDRES 0.454131 Hz  
AQ 1.1010048 sec  
RG 575  
DW 16.800 usec  
DE 7.68 usec  
TE 295.7 K  
D1 2.0000000 sec  
D11 0.0300000 sec  
TD0 1

----- CHANNEL f1 -----  
SFO1 125.8131151 MHz  
NUC1 13C  
P1 9.75 usec  
PLM1 82.38999939 W

----- CHANNEL f2 -----  
SFO2 500.3020012 MHz  
NUC2 1H  
CPDPRG2 waltr16  
PCPD2 80.00 usec  
PLM2 18.33600044 W  
PLM12 0.75654000 W  
PLM13 0.48418999 W

F2 - Processing parameters  
SI 65536  
SF 125.8005350 MHz  
WDW EM  
SSB 0  
LB 1.00 Hz  
GB 0  
PC 1.40

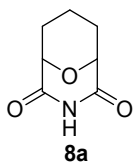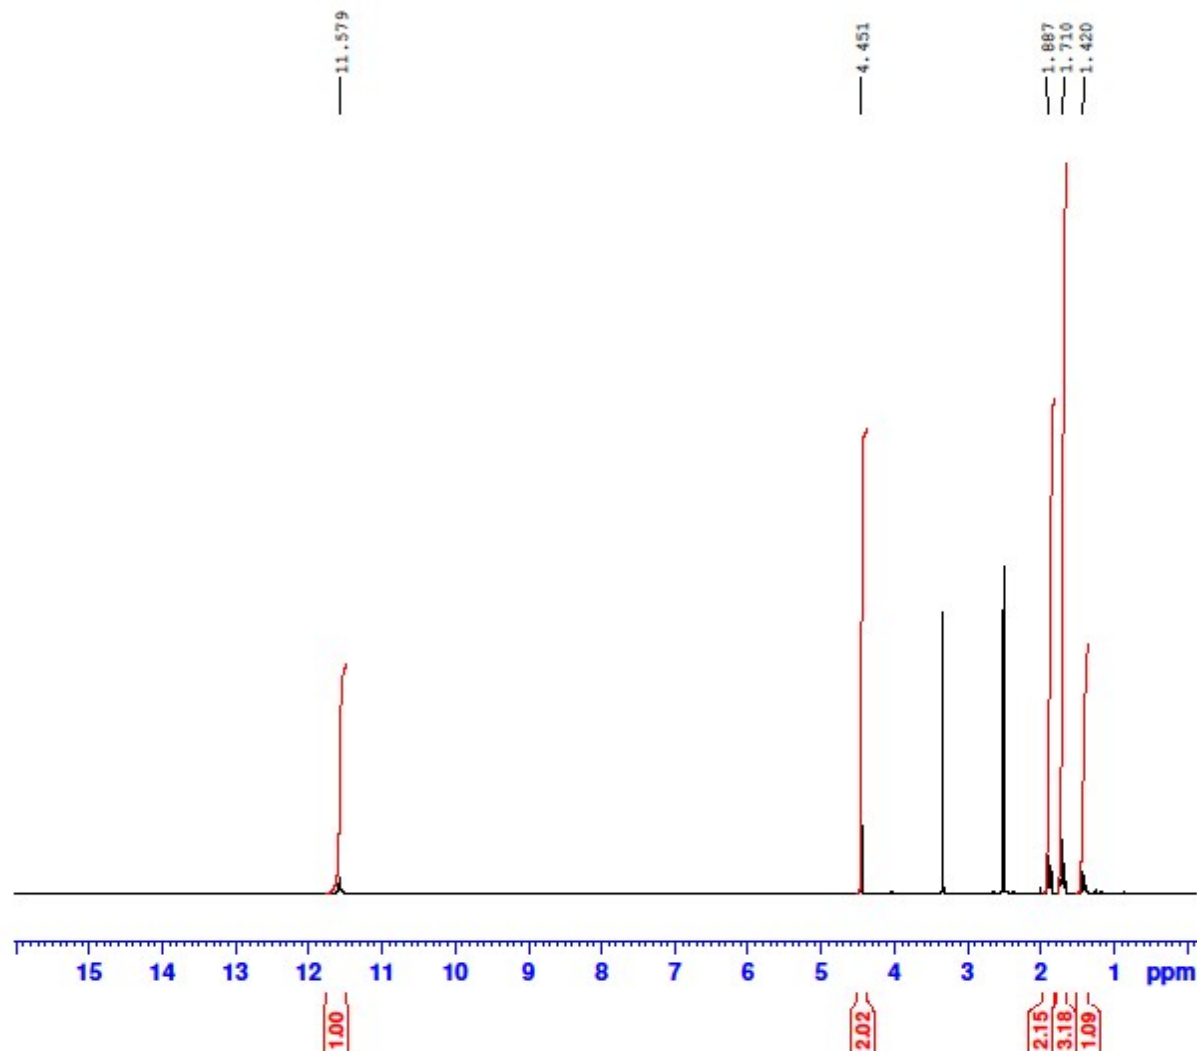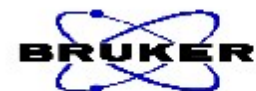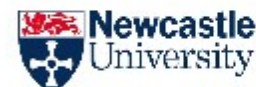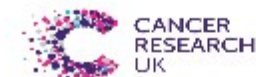

Current Data Parameters  
 NAME JEP-489-090  
 EXPNO 11  
 PROCNO 1

F2 - Acquisition Parameters  
 Date\_ 20141016  
 Time 8.51  
 INSTRUM spect  
 PROBHD 5 mm PABBO BB-  
 PULPROG zg30  
 TD 65536  
 SOLVENT DMSO  
 NS 16  
 DS 0  
 SWH 10330.578 Hz  
 FIDRES 0.157632 Hz  
 AQ 3.1719425 sec  
 RG 724  
 DW 48.400 usec  
 DE 11.99 usec  
 TE 295.3 K  
 D1 1.00000000 sec  
 TD0 1

==== CHANNEL f1 =====  
 SFO1 500.3030896 MHz  
 NUC1 1H  
 P1 16.25 usec  
 PLW1 18.33600044 W

F2 - Processing parameters  
 SI 65536  
 SF 500.300000 MHz  
 WDW EM  
 SSB 0  
 LB 0.30 Hz  
 GB 0  
 PC 1.00

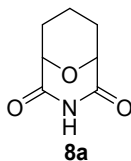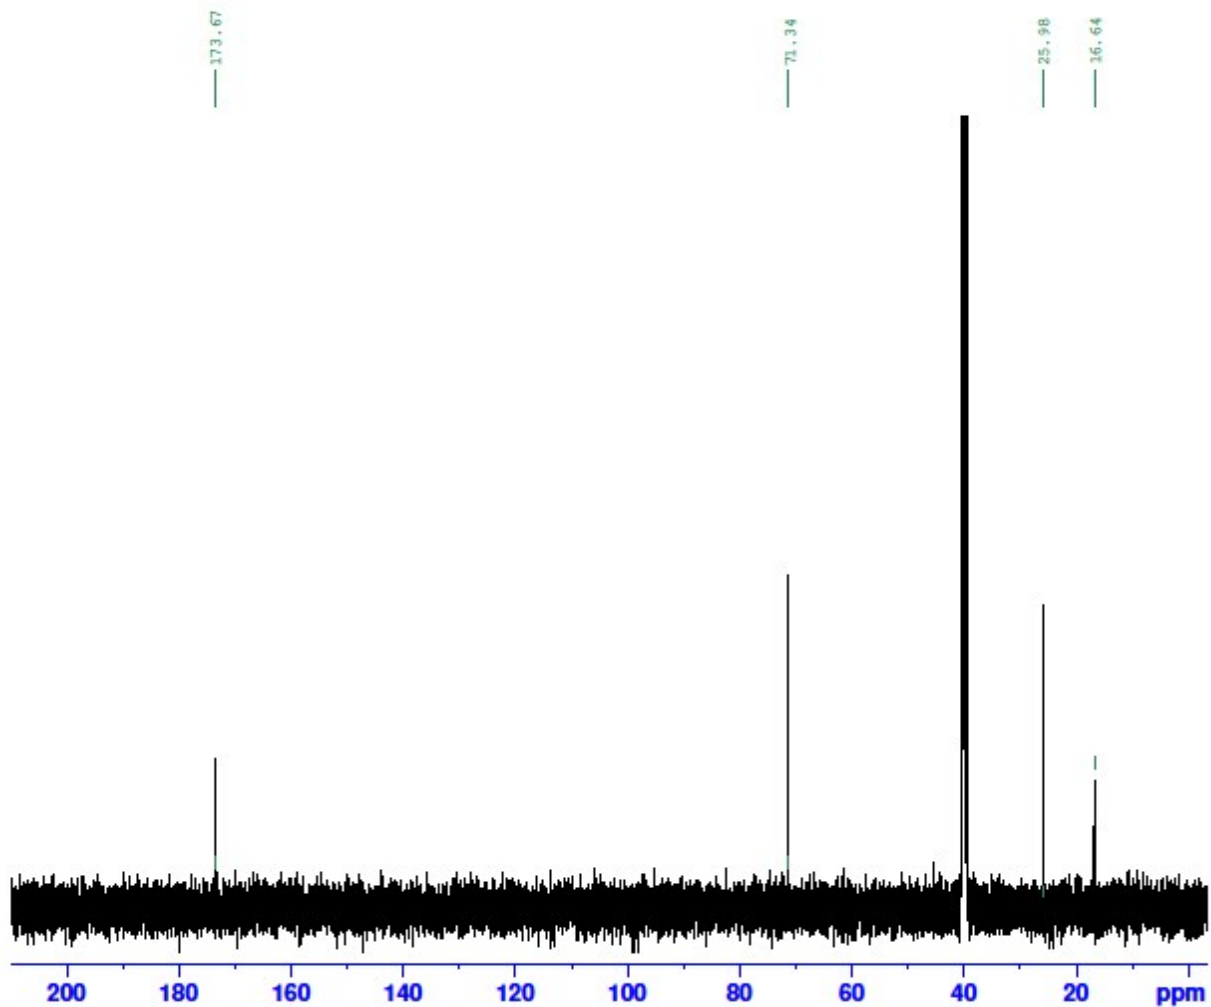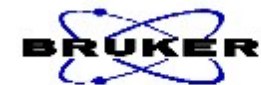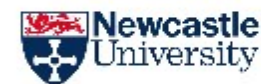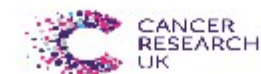

Current Data Parameters  
 NAME JEP-489-090  
 EXPNO 16  
 PROCNO 1

F2 - Acquisition Parameters  
 Date\_ 20141016  
 Time 22.44  
 INSTRUM spect  
 PROBHD 5 mm PABBO BB-  
 PULPROG zgpg30  
 TD 65536  
 SOLVENT DMSO  
 NS 256  
 DS 2  
 SWH 29761.904 Hz  
 FIDRES 0.454131 Hz  
 AQ 1.1010048 sec  
 RG 456  
 DW 16.800 usec  
 DE 7.68 usec  
 TE 298.5 K  
 D1 2.0000000 sec  
 D11 0.0300000 sec  
 TD0 1

----- CHANNEL f1 -----  
 SFO1 125.8131151 MHz  
 NUC1 13C  
 P1 9.75 usec  
 P1M1 82.38999939 W

----- CHANNEL f2 -----  
 SFO2 500.3020012 MHz  
 NUC2 1H  
 CPDPRG2 waltr16  
 PCPD2 80.00 usec  
 P1M2 18.33600044 W  
 P1M12 0.75654000 W  
 P1M13 0.48418999 W

F2 - Processing parameters  
 SI 65536  
 SF 125.8005350 MHz  
 WSW EM  
 SSB 0  
 LB 1.00 Hz  
 GB 0  
 PC 1.40



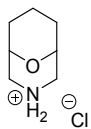

2a

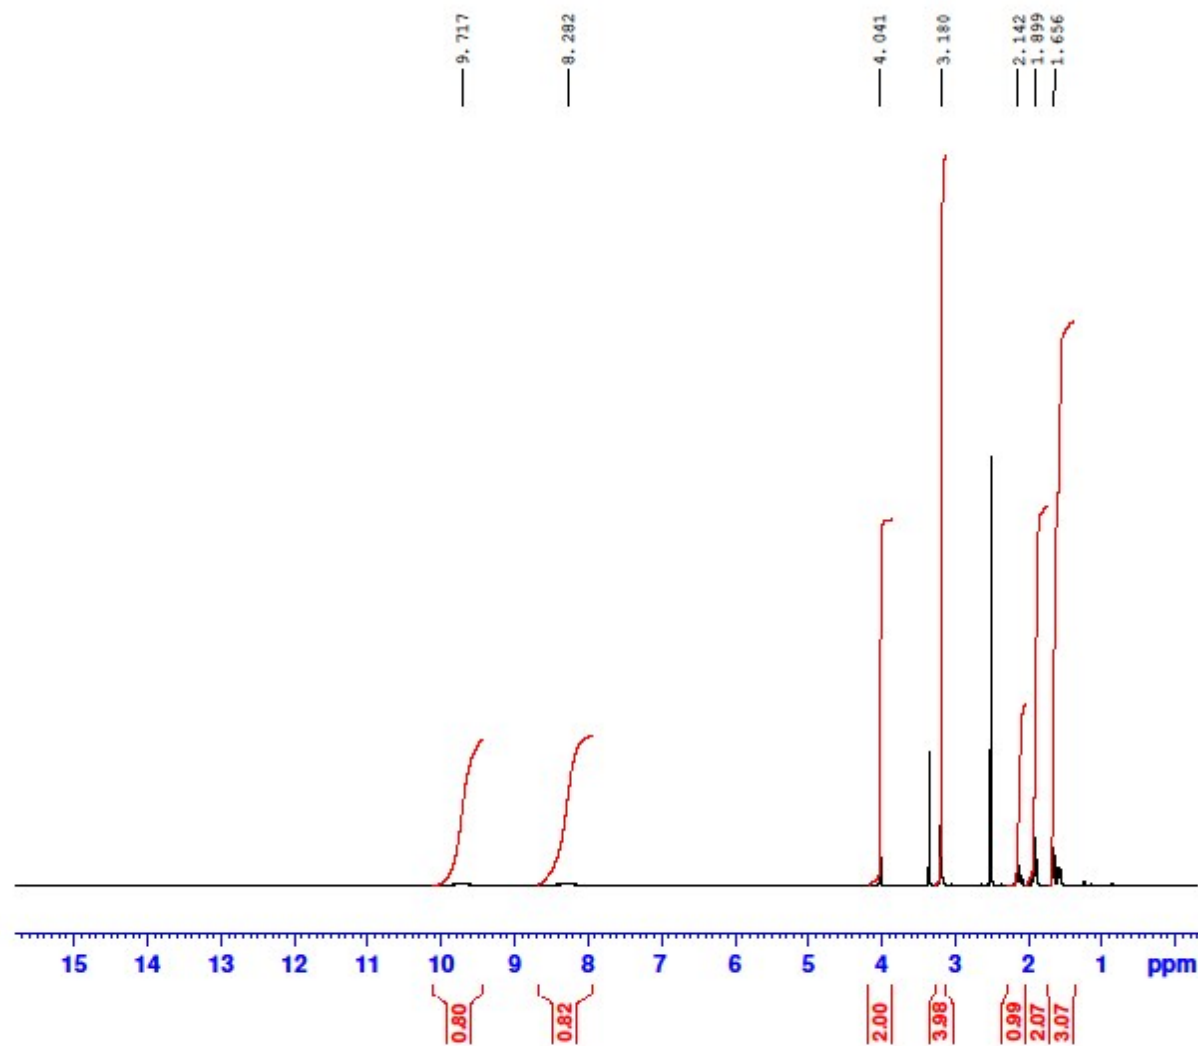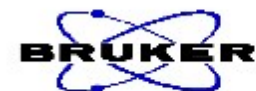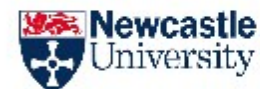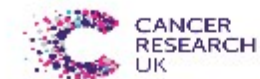

Current Data Parameters  
 NAME JEP-489-162  
 EXPNO 20  
 PROCNO 1

F2 - Acquisition Parameters  
 Date\_ 20150213  
 Time 9.15  
 INSTRUM spect  
 PROBHD 5 mm PABBO BB-  
 PULPROG zg30  
 ID 65536  
 SOLVENT DMSO  
 NS 16  
 DS 0  
 SWH 10330.578 Hz  
 FIDRES 0.157632 Hz  
 AQ 3.1719425 sec  
 RG 575  
 DW 48.400 usec  
 DE 11.99 usec  
 TE 292.5 K  
 D1 1.00000000 sec  
 TDO 1

==== CHANNEL f1 =====  
 SFO1 500.3030896 MHz  
 NUC1 1H  
 P1 16.25 usec  
 PLW1 18.33600044 W

F2 - Processing parameters  
 SI 65536  
 SF 500.3000000 MHz  
 WDW EM  
 SSB 0  
 LB 0.30 Hz  
 GB 0  
 PC 1.00

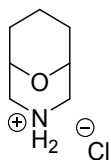

2a

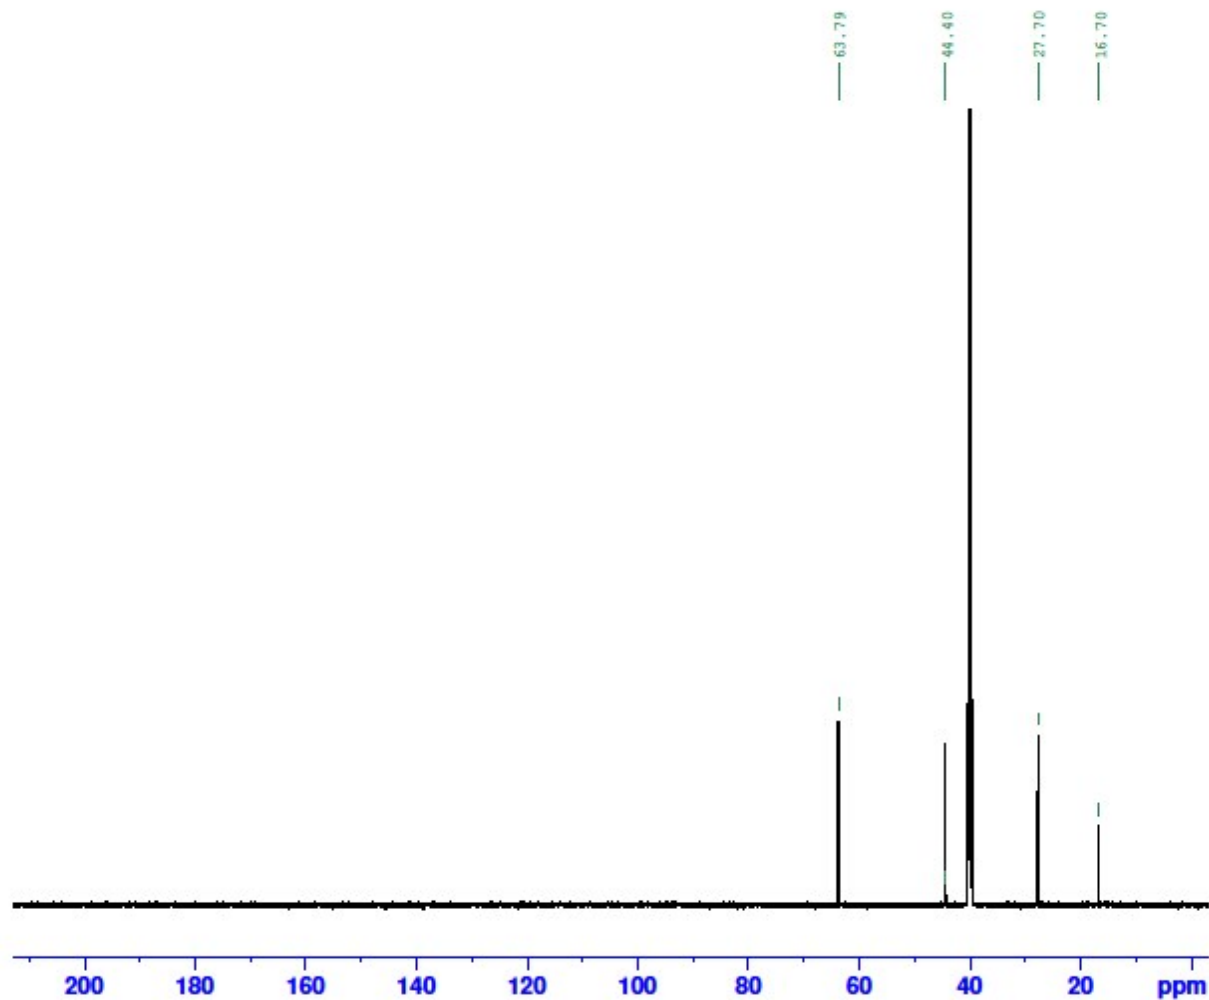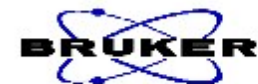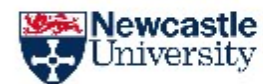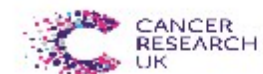

Current Data Parameters  
 NAME JEP-489-142  
 EXPNO 25  
 PROCNO 1

F2 - Acquisition Parameters  
 Date\_ 20150214  
 Time 0.38  
 INSTRUM spect  
 PROBHD 5 mm PARBO BB-  
 PULPROG zgpg  
 ID 41442  
 SOLVENT DMSO  
 NS 2656  
 DS 2  
 SWH 29761.904 Hz  
 FIDRES 0.714366 Hz  
 AQ 0.6999216 sec  
 RC 456  
 DW 16.800 usec  
 DE 7.72 usec  
 TE 296.4 K  
 D1 5.0000000 sec  
 D11 0.0300000 sec  
 TD0 1

----- CHANNEL f1 -----  
 SFO1 125.8131151 MHz  
 NUC1 13C  
 P1 9.75 usec  
 PLW1 82.38999939 W

----- CHANNEL f2 -----  
 SFO2 500.3020012 MHz  
 NUC2 1H  
 CPDPRG[2] waltz16  
 PCPD2 80.00 usec  
 PLW2 18.33600044 W  
 PLW12 0.75654000 W  
 PLW13 0.48418999 W

F2 - Processing parameters  
 SI 65536  
 SF 125.8005350 MHz  
 WMW EM  
 SSB 0  
 LB 1.00 Hz  
 GB 0  
 PC 1.40

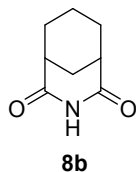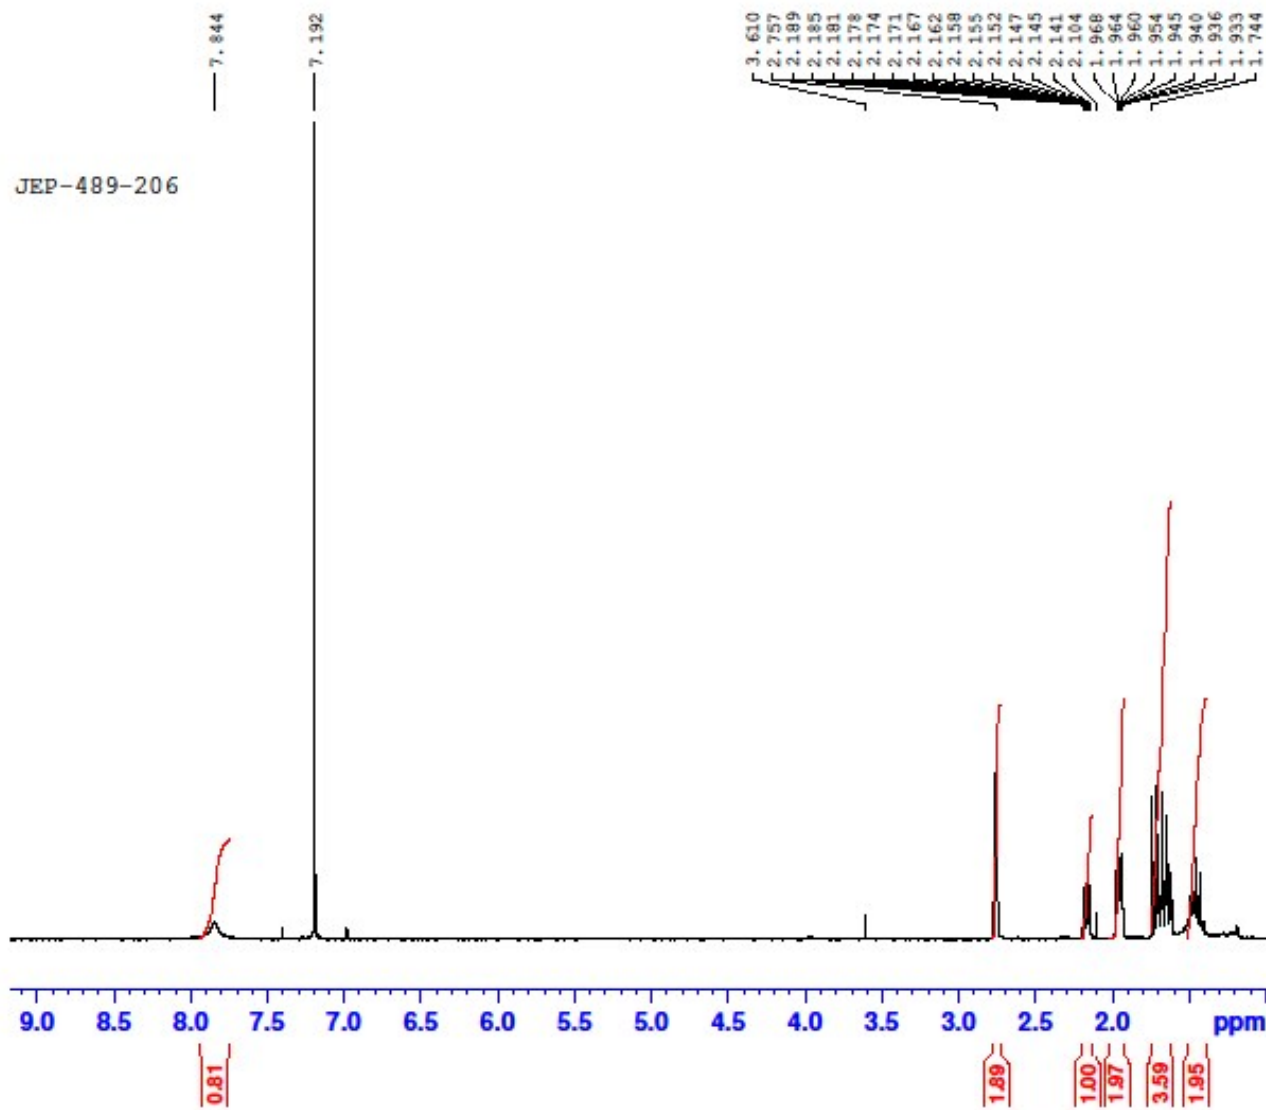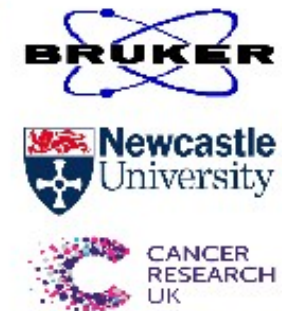

Current Data Parameters  
 NAME JEP-489-206  
 EXPNO 60  
 PROCNO 1

F2 - Acquisition Parameters  
 Date\_ 20150602  
 Time 15.45  
 INSTRUM spect  
 PROBHD 5 mm PABBO BB-  
 PULPROG zg30  
 TD 65536  
 SOLVENT CDCl3  
 NS 16  
 DS 0  
 SWH 10330.578 Hz  
 FIDRES 0.157632 Hz  
 AQ 3.1719425 sec  
 RG 812  
 DW 48.400 usec  
 DE 11.99 usec  
 TE 297.0 K  
 D1 1.00000000 sec  
 TD0 1

==== CHANNEL f1 =====  
 SFO1 500.3030896 MHz  
 NUC1 1H  
 P1 16.25 usec  
 PLW1 18.33600044 W

F2 - Processing parameters  
 SI 65536  
 SF 500.3000461 MHz  
 WDW EM  
 SSB 0  
 LB 0.30 Hz  
 CB 0  
 PC 1.00



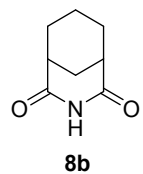

JEP-489-206

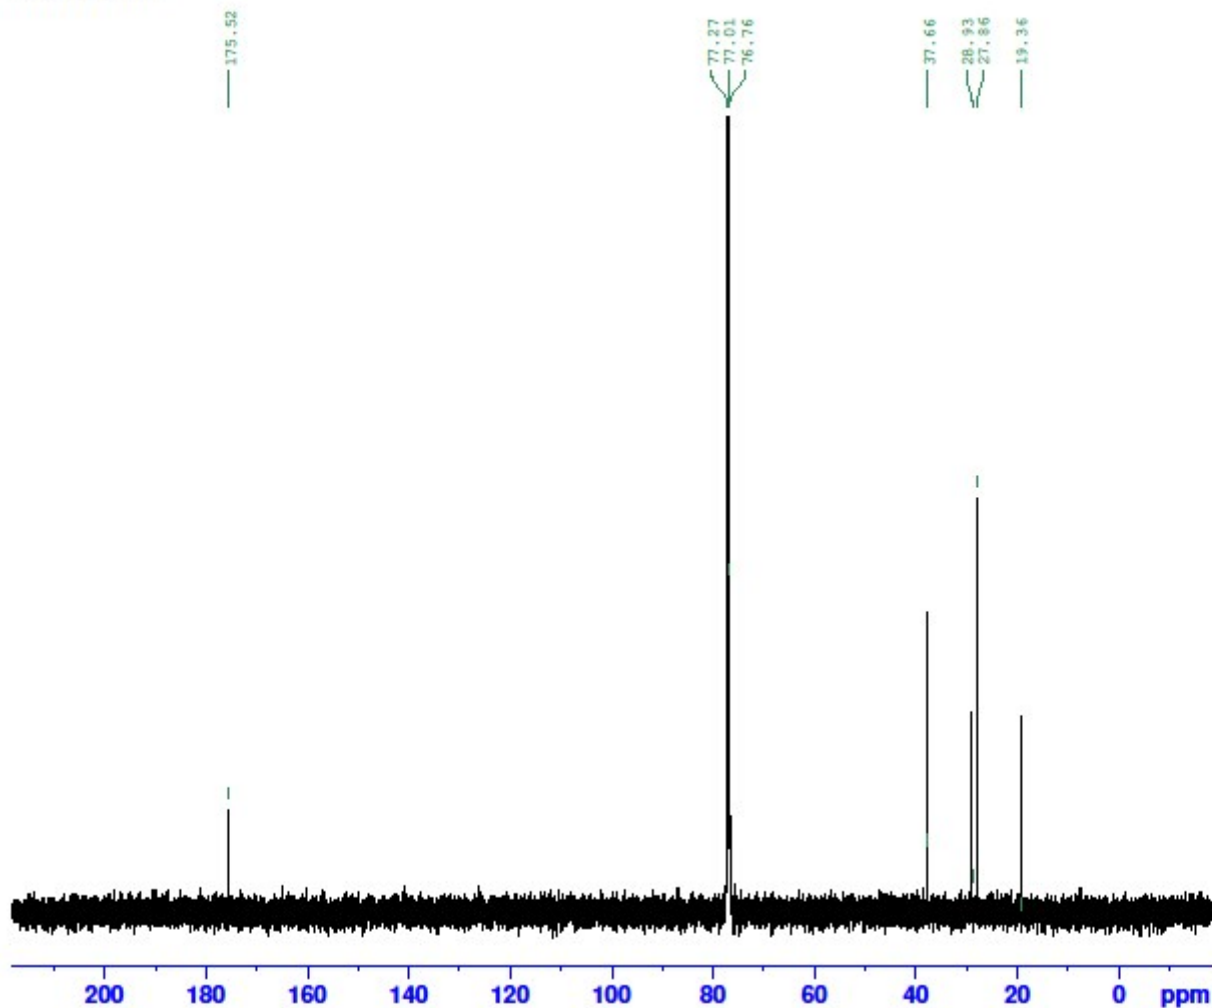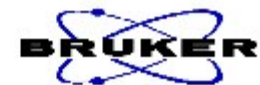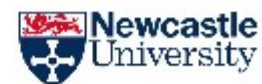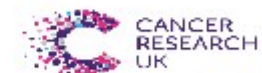

Current Data Parameters  
 NAME JEP-489-206  
 EXPNO 61  
 PROCNO 1

F2 - Acquisition Parameters  
 Date\_ 20150603  
 Time 4.41  
 INSTRUM spect  
 PROBHD 5 mm PABBO BB-  
 PULPROG zgpg30  
 TD 65536  
 SOLVENT CDCl3  
 NS 2560  
 DS 2  
 SWH 29761.904 Hz  
 FIDRES 0.454131 Hz  
 AQ 1.1010048 sec  
 RG 456  
 DW 16.800 usec  
 DE 7.68 usec  
 TE 298.9 K  
 D1 2.0000000 sec  
 D11 0.0300000 sec  
 TD0 1

----- CHANNEL f1 -----  
 SFO1 125.8131151 MHz  
 NUC1 13C  
 P1 9.75 usec  
 PWM1 82.38999939 W

----- CHANNEL f2 -----  
 SFO2 500.3020012 MHz  
 NUC2 1H  
 CPDPRG2 waltz16  
 PCPD2 80.00 usec  
 PWM2 18.33600044 W  
 PWM12 0.75654000 W  
 PWM13 0.48418999 W

F2 - Processing parameters  
 SI 65536  
 SF 125.8005350 MHz  
 WDW EM  
 SSB 0  
 LB 1.00 Hz  
 GB 0  
 PC 1.40

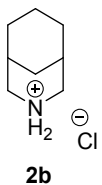

JEP-489-214

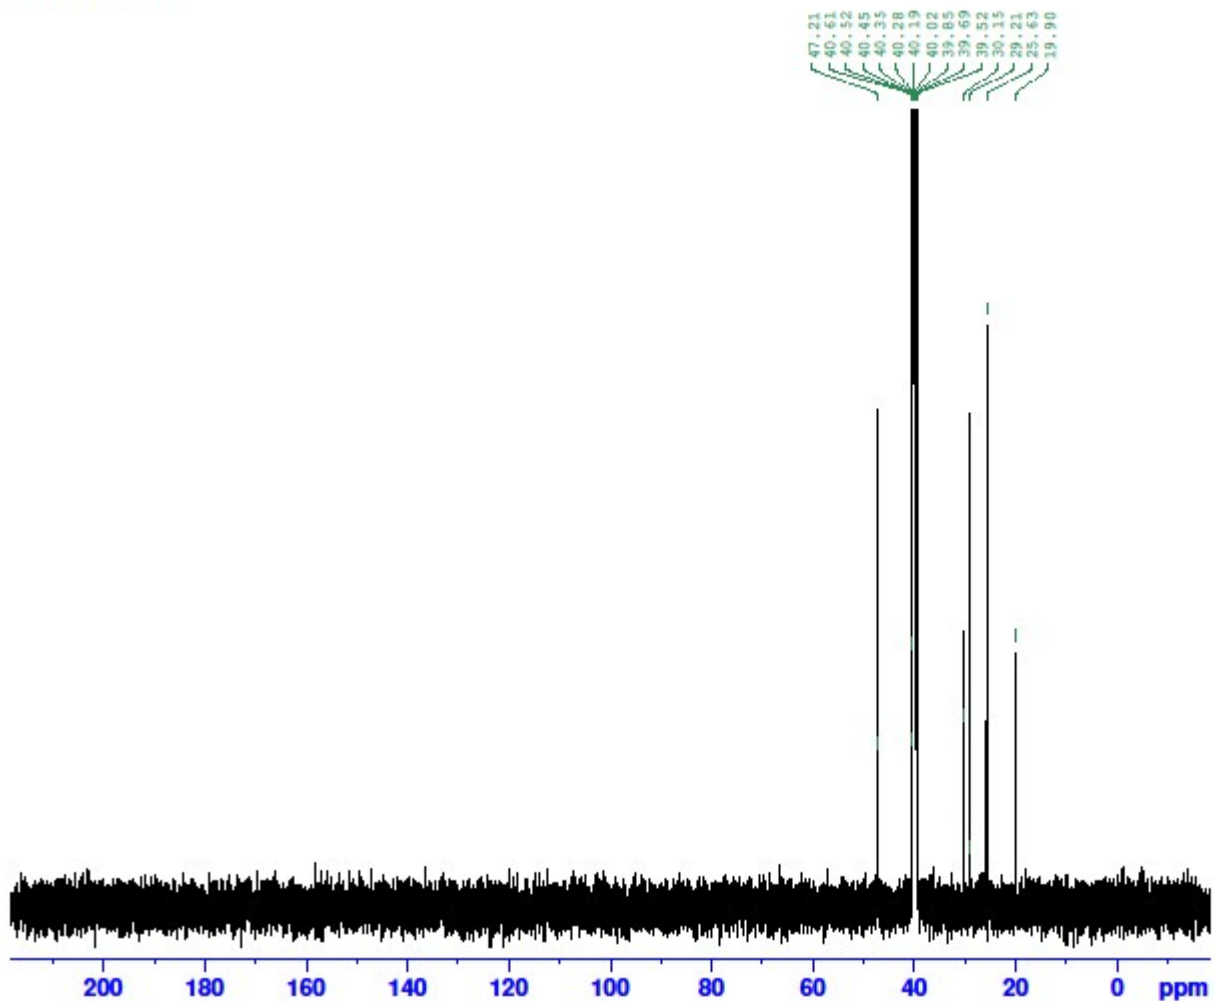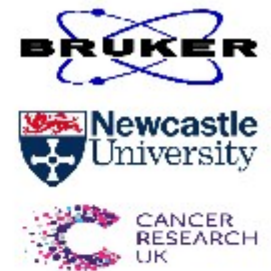

```

Current Data Parameters
NAME      JEP-489-214
EXPNO     36
PROCNO    1

F2 - Acquisition Parameters
Date_     20150608
Time      20.56
INSTRUM   spect
PROBHD    5 mm PABBO BB-
PULPROG   zgpg30
TD         65536
SOLVENT   DMSO
NS         2560
DS         2
SWH        29761.904 Hz
FIDRES     0.454131 Hz
AQ         1.1010048 sec
RG         456
DW         16.800 usec
DE         7.68 usec
TE         298.5 K
D1         2.0000000 sec
D11        0.0300000 sec
TD0        1

----- CHANNEL f1 -----
SFO1      125.8131151 MHz
NUC1       13C
P1         9.75 usec
PLW1       82.38999939 W

----- CHANNEL f2 -----
SFO2      500.3020012 MHz
NUC2       1H
CPDPRG2   waltz16
PCPD2     80.00 usec
PLW2      18.33600044 W
PLW12     0.75654000 W
PLW13     0.48418999 W

F2 - Processing parameters
SI         65536
SF         125.8005350 MHz
WDW        EM
SSB        0
LB         1.00 Hz
GB         0
PC         1.40

```

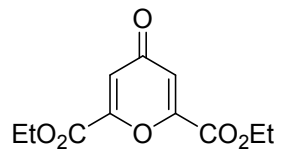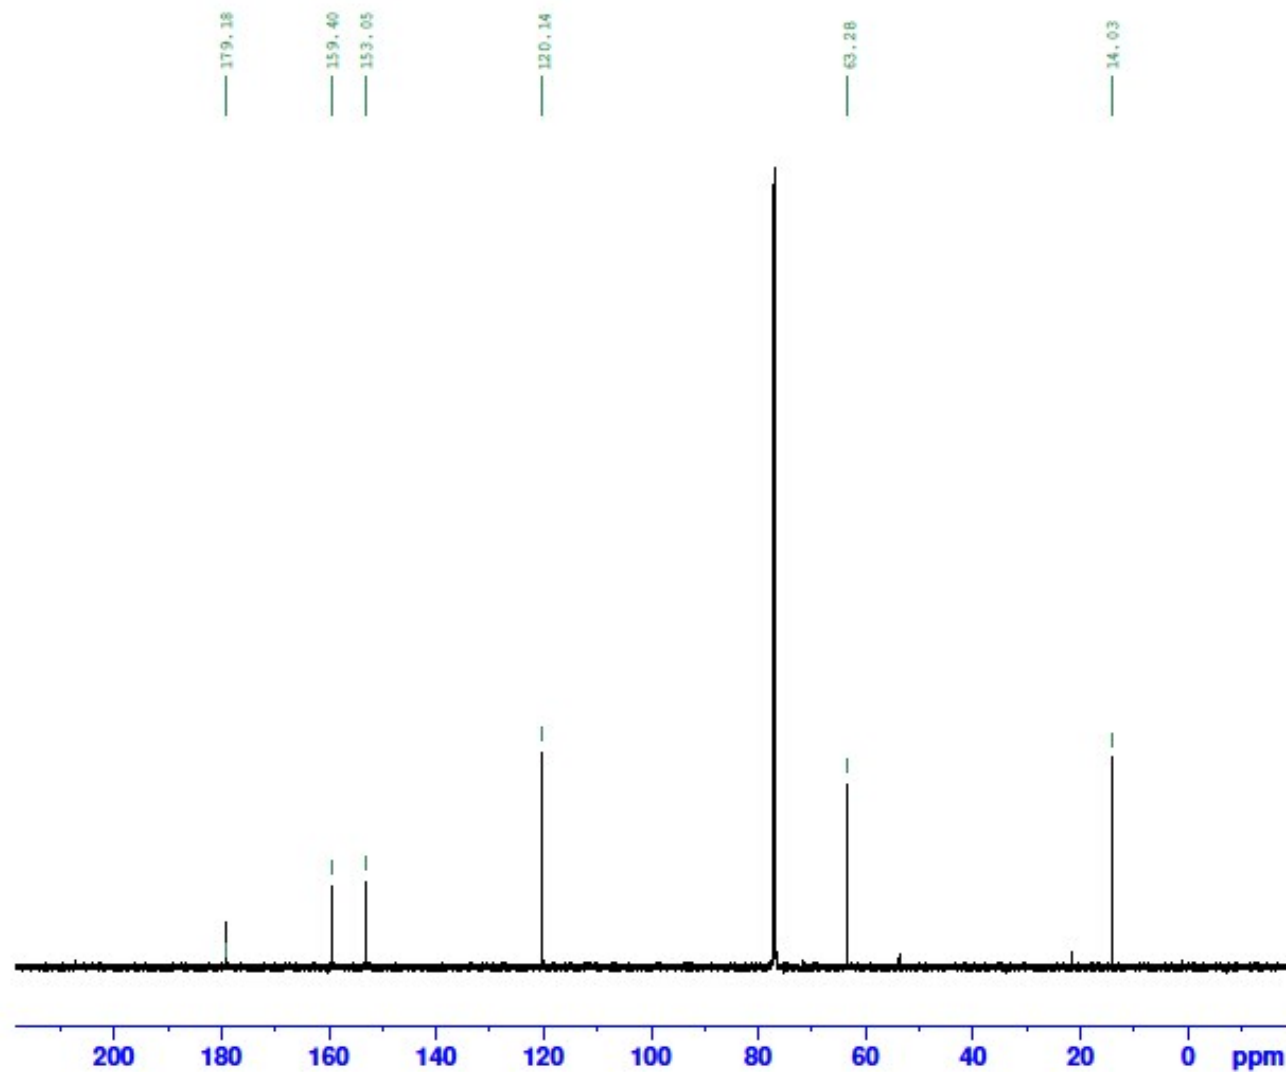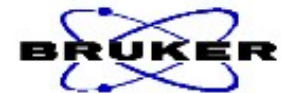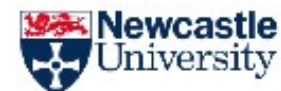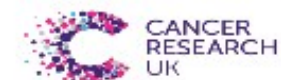

Current Data Parameters  
 NAME MA-502-76  
 EXPNO 32  
 PROCNO 1

F2 - Acquisition Parameters  
 Date\_ 20150701  
 Time 4.49  
 INSTRUM spect  
 PROBHD 5 mm PABBO BB-  
 PULPROG zgpg30  
 TD 65536  
 SOLVENT CDCl3  
 NS 1024  
 DS 2  
 SWH 29761.904 Hz  
 FIDRES 0.454131 Hz  
 AQ 1.1010048 sec  
 RG 456  
 DW 16.800 usec  
 DE 7.68 usec  
 TE 299.7 K  
 D1 2.0000000 sec  
 D11 0.0300000 sec  
 TD0 1

----- CHANNEL f1 -----  
 SFO1 125.8131151 MHz  
 NUC1 13C  
 P1 9.75 usec  
 PLW1 82.38999939 W

----- CHANNEL f2 -----  
 SFO2 500.3020012 MHz  
 NUC2 1H  
 CPDPRG[2] waltz16  
 PCPD2 80.00 usec  
 PLW2 18.33600044 W  
 PLW12 0.75654000 W  
 PLW13 0.48418999 W

F2 - Processing parameters  
 SI 65536  
 SF 125.8005350 MHz  
 WM EM  
 SSB 0  
 LB 1.00 Hz  
 GB 0  
 PC 1.40

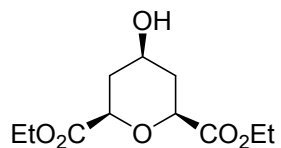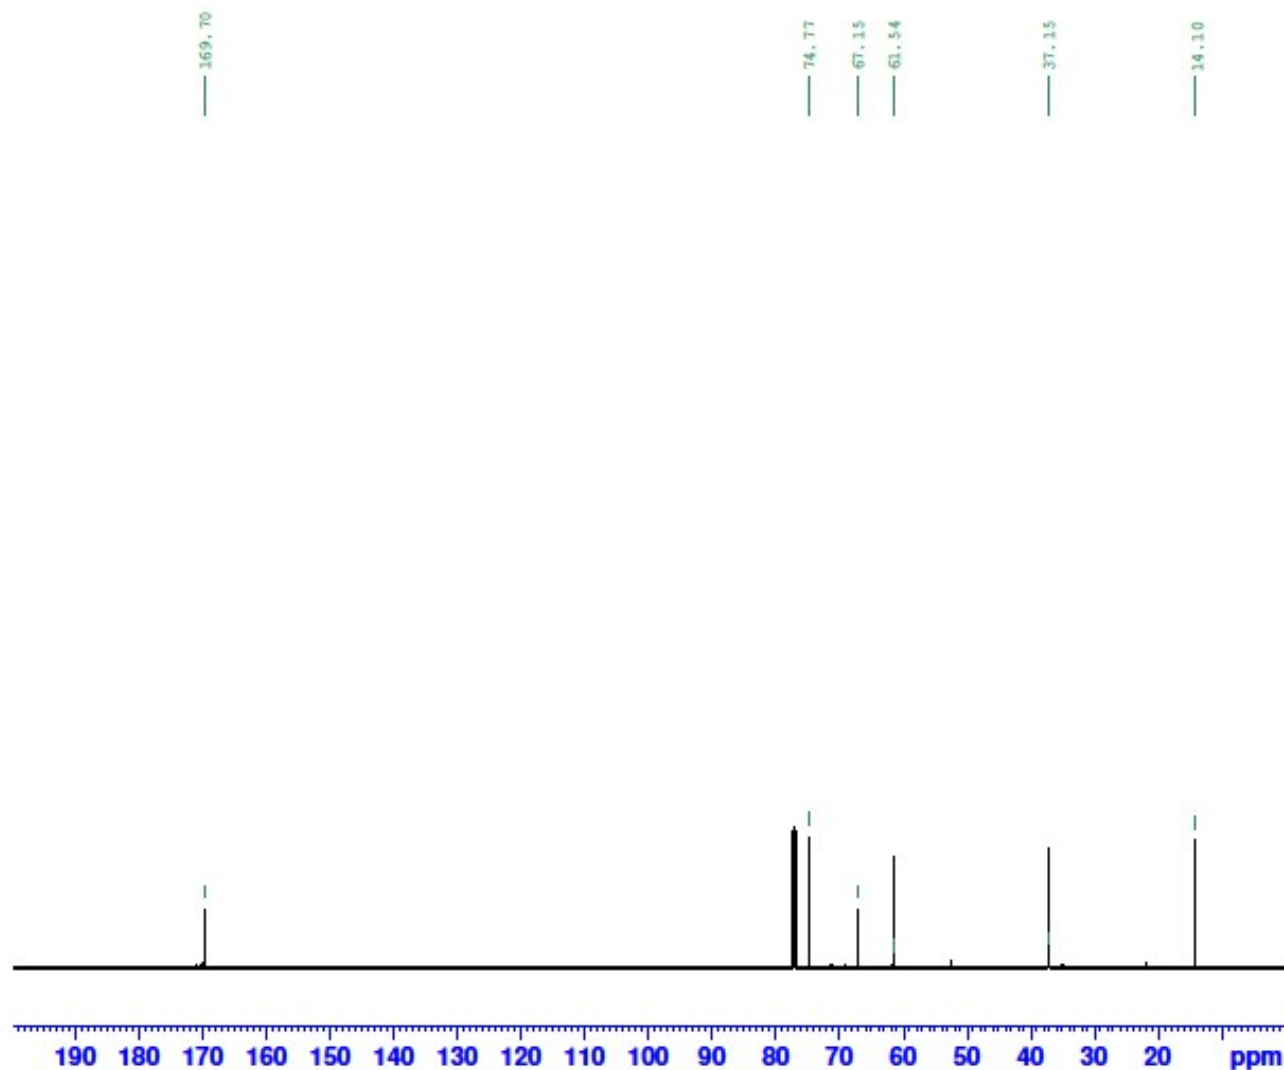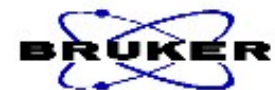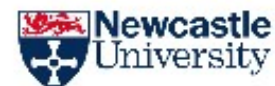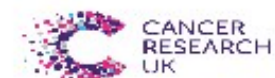

Current Data Parameters  
 NAME ma-502-81 (20-30)  
 EXPNO 13  
 PROCNO 1

F2 - Acquisition Parameters  
 Date\_ 20150709  
 Time 1.37  
 INSTRUM spect  
 PROBHD 5 mm PABBO BB-  
 PULPROG zgpg30  
 TD 65536  
 SOLVENT CDCl3  
 NS 1024  
 DS 2  
 SWH 29761.904 Hz  
 FIDRES 0.454131 Hz  
 AQ 1.1010048 sec  
 RG 456  
 DW 16.800 usec  
 DE 7.68 usec  
 TE 298.0 K  
 D1 2.0000000 sec  
 D11 0.0300000 sec  
 TD0 1

----- CHANNEL f1 -----  
 SFO1 125.8131151 MHz  
 NUC1 13C  
 P1 9.75 usec  
 PLW1 82.38999939 W

----- CHANNEL f2 -----  
 SFO2 500.3020012 MHz  
 NUC2 1H  
 CPDPRG[2] waltz16  
 PCPD2 80.00 usec  
 PEW2 18.33600044 W  
 PEW12 0.75654000 W  
 PEW13 0.48418999 W

F2 - Processing parameters  
 SI 65536  
 SF 125.8005350 MHz  
 WM EM  
 SSB 0  
 LB 1.00 Hz  
 GB 0  
 PC 1.40



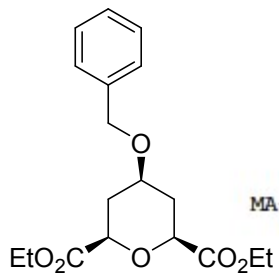

MA-502-79 target compd

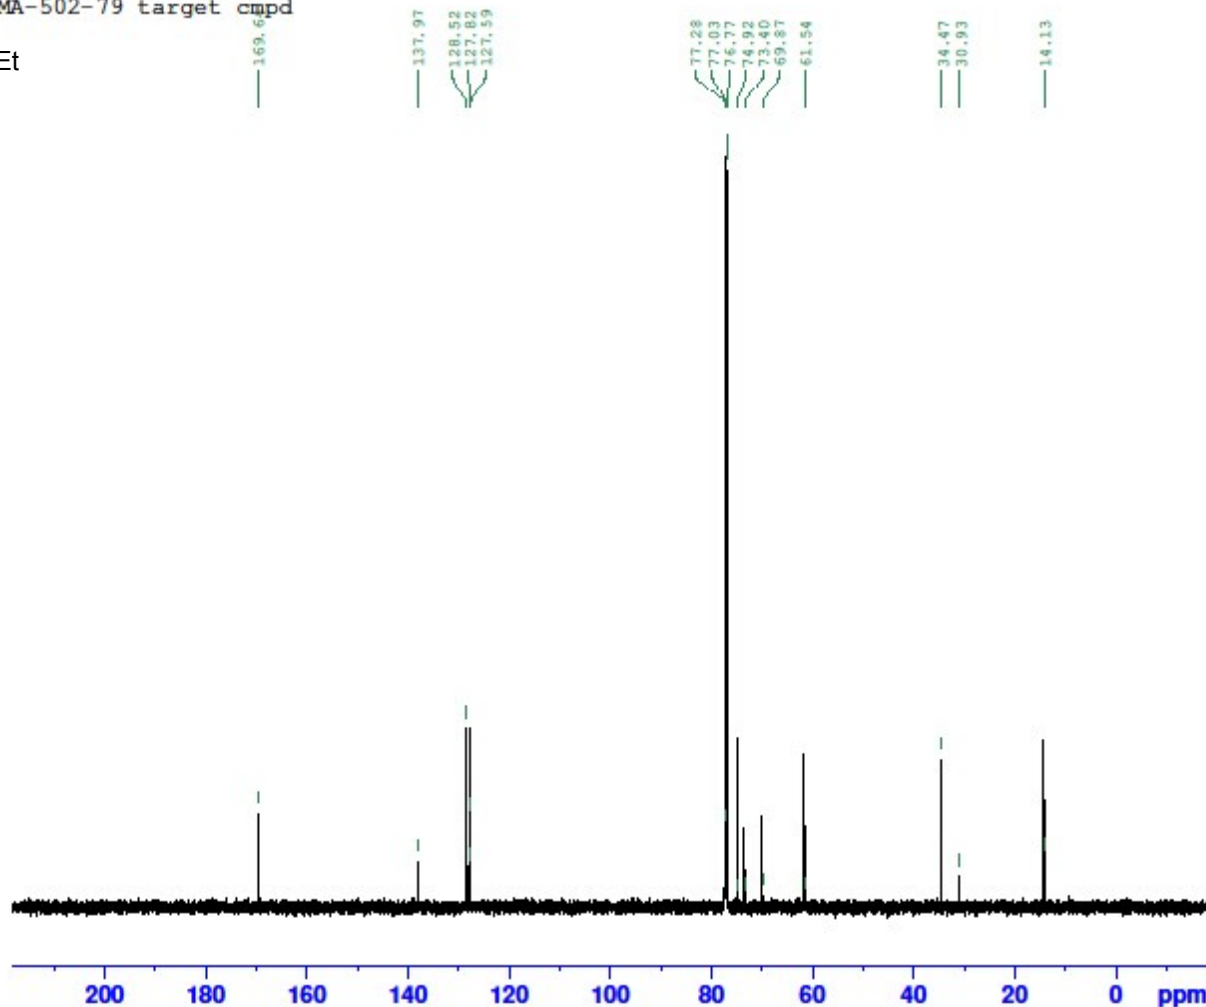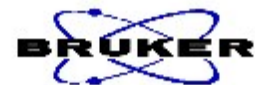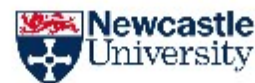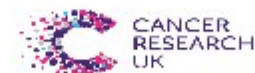

Current Data Parameters  
 NAME MA-502-79 target compd  
 EXPNO 13  
 PROCNO 1

F2 - Acquisition Parameters  
 Date\_ 20150706  
 Time 20.57  
 INSTRUM spect  
 PROBRD 5 mm PABBO BB-  
 PULPROG zgpg30  
 TD 65536  
 SOLVENT cdcl3  
 NS 256  
 DS 2  
 SWH 29761.904 Hz  
 FIDRES 0.454131 Hz  
 AQ 1.1010048 sec  
 RG 575  
 DW 16.800 usec  
 DE 7.68 usec  
 TE 298.9 K  
 D1 2.0000000 sec  
 D11 0.0300000 sec  
 TD0 1

CHANNEL F1  
 SFO1 125.8131151 Mhz  
 NUC1 13C  
 P1 9.75 usec  
 PLW1 82.38999939 W

CHANNEL F2  
 SFO2 500.3020012 Mhz  
 NUC2 1H  
 CPDPRG2 waltz16  
 PCPD2 80.00 usec  
 PLW2 18.33600044 W  
 PLW12 0.75654000 W  
 PLW13 0.48418999 W

F2 - Processing parameters  
 SI 65536  
 SF 125.8005350 Mhz  
 WDW EM  
 SSB 0  
 LB 1.00 Hz  
 GB 0  
 PC 1.40

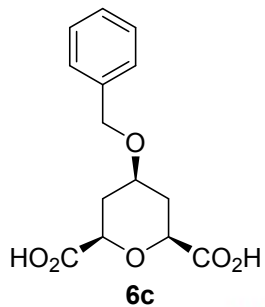

JEP-514-070

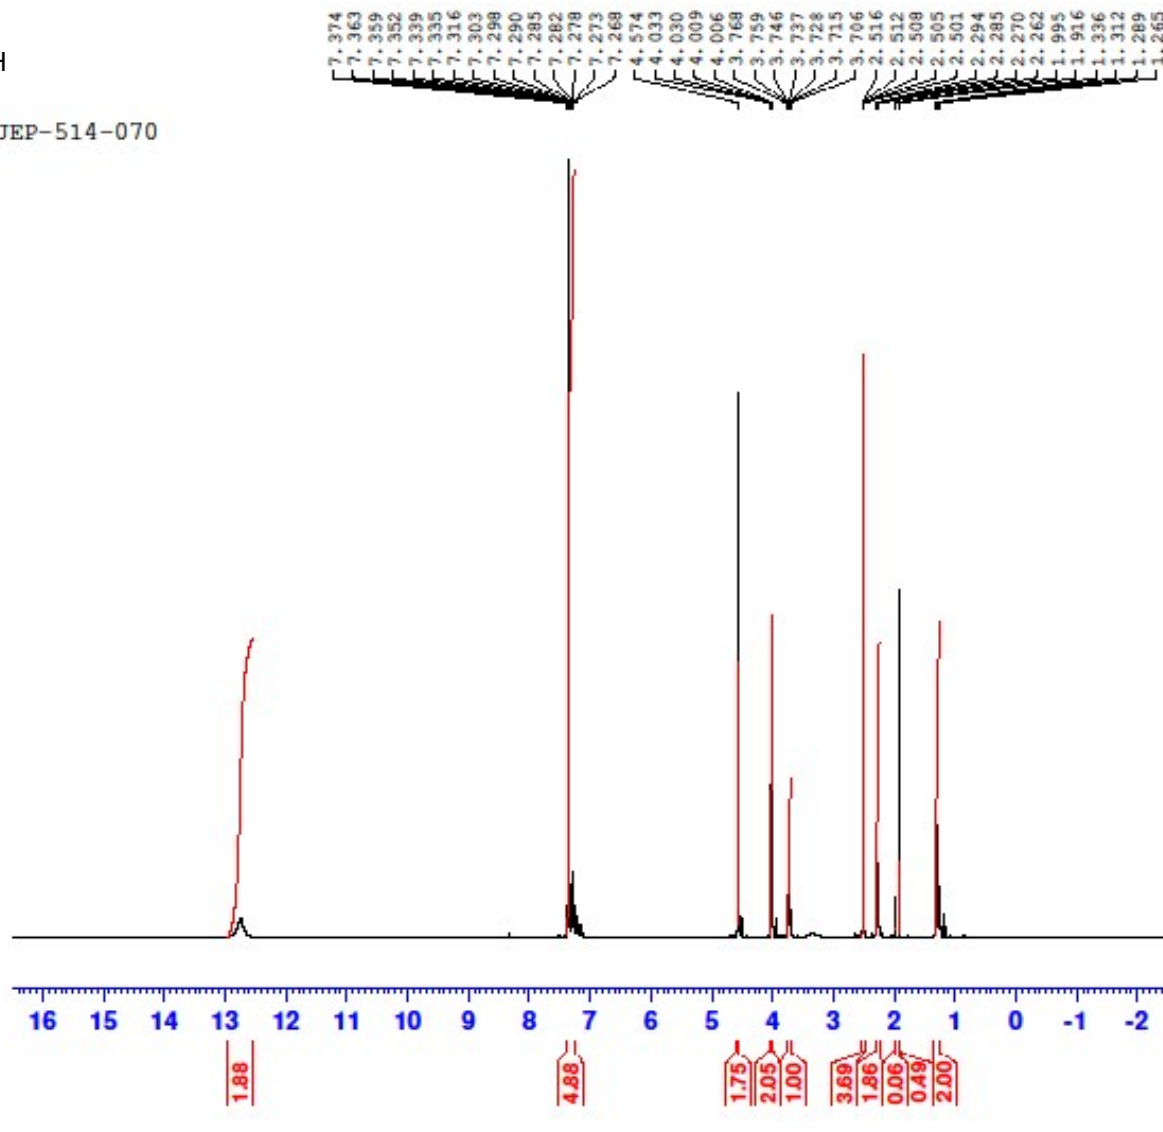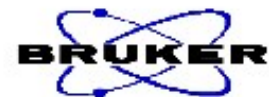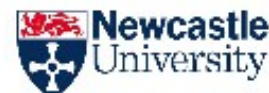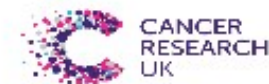

Current Data Parameters  
 NAME JEP-514-070  
 EXPNO 20  
 PROCNO 1

F2 - Acquisition Parameters  
 Date\_ 20150814  
 Time 15.15  
 INSTRUM spect  
 PROBHD 5 mm PABBO BB-  
 PULPROG zg30  
 ID 65536  
 SOLVENT DMSO  
 NS 16  
 DS 0  
 SWH 10330.578 Hz  
 FIDRES 0.157632 Hz  
 AQ 3.1719425 sec  
 RG 322  
 DW 48.400 usec  
 DE 11.99 usec  
 TE 296.9 K  
 D1 1.00000000 sec  
 TD0 1

==== CHANNEL f1 =====  
 SFO1 500.3030896 MHz  
 NUC1 1H  
 P1 16.25 usec  
 PLW1 18.33600044 W

F2 - Processing parameters  
 SI 65536  
 SF 500.3000000 MHz  
 WDW EM  
 SSB 0  
 LB 0.30 Hz  
 GB 0  
 PC 1.00

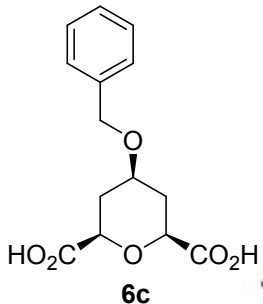

JEP-514-070

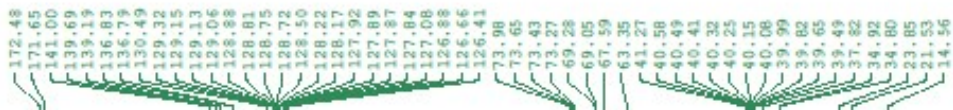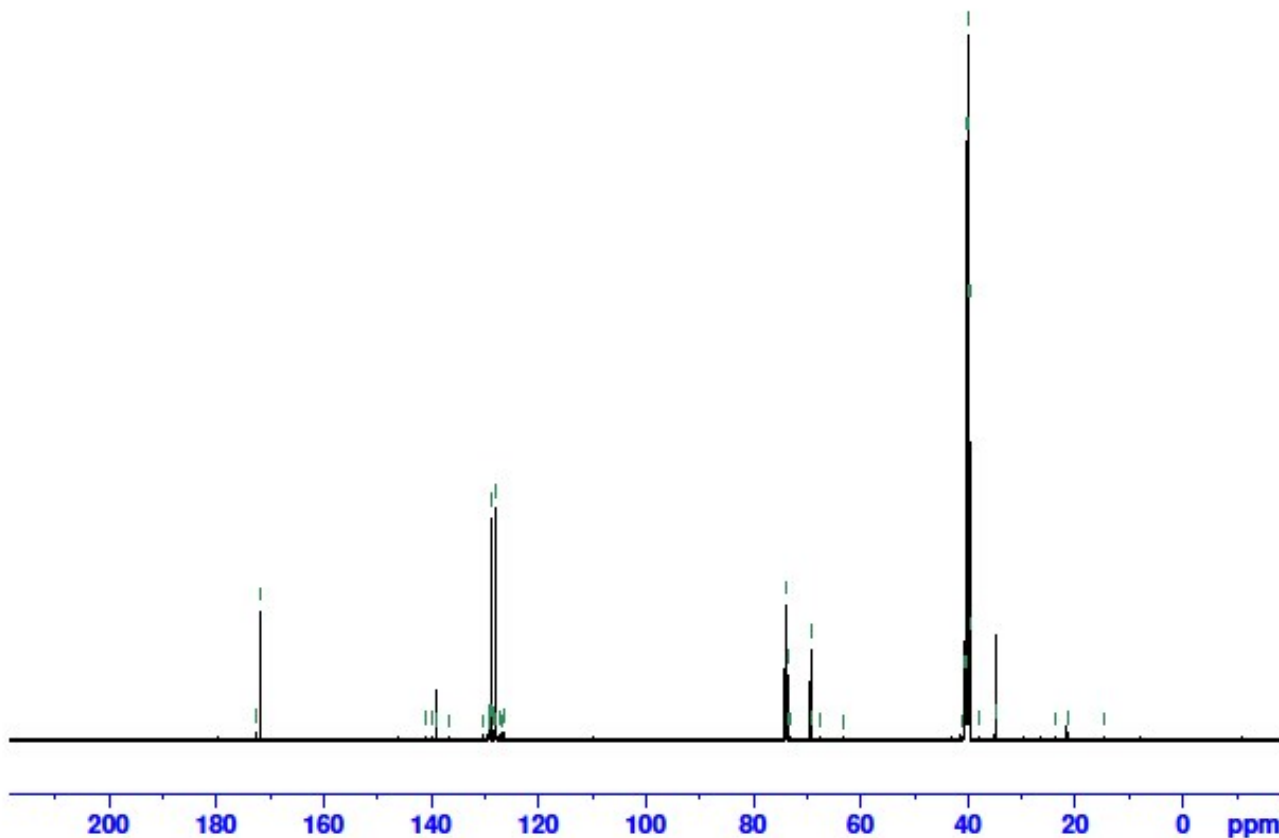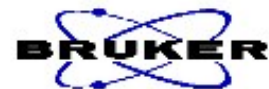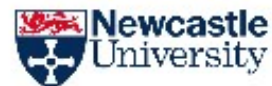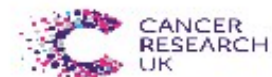

Current Data Parameters  
NAME JEP-514-070  
EXPNO 21  
PROCNO 1

F2 - Acquisition Parameters  
Date\_ 20150815  
Time 11.53  
INSTRUM spect  
PROBHD 5 mm PABBO BB-  
PULPROG zgpg  
TD 41662  
SOLVENT DMSO  
NS 2656  
DS 2  
SWH 29761.904 Hz  
FIDRES 0.714366 Hz  
AQ 0.6999216 sec  
RG 456  
DW 16.800 usec  
DE 7.72 usec  
TE 297.9 K  
D1 5.0000000 sec  
D11 0.0300000 sec  
TD0 1

----- CHANNEL f1 -----  
SFO1 125.8131151 MHz  
NUC1 13C  
P1 9.75 usec  
PLW1 82.38999939 W

----- CHANNEL f2 -----  
SFO2 500.3020012 MHz  
NUC2 1H  
CPDPRG2 waltz16  
PCPD2 80.00 usec  
PLW2 18.33600044 W  
PLW12 0.75654000 W  
PLW13 0.48418999 W

F2 - Processing parameters  
SI 65536  
SF 125.8005350 MHz  
WDW EM  
SSB 0  
LB 1.00 Hz  
GB 0  
PC 1.40

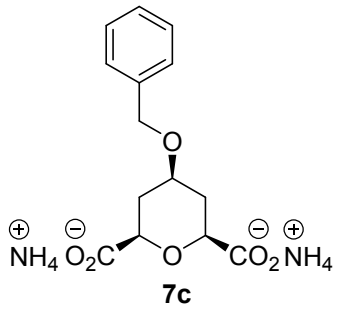

JEP-514-074

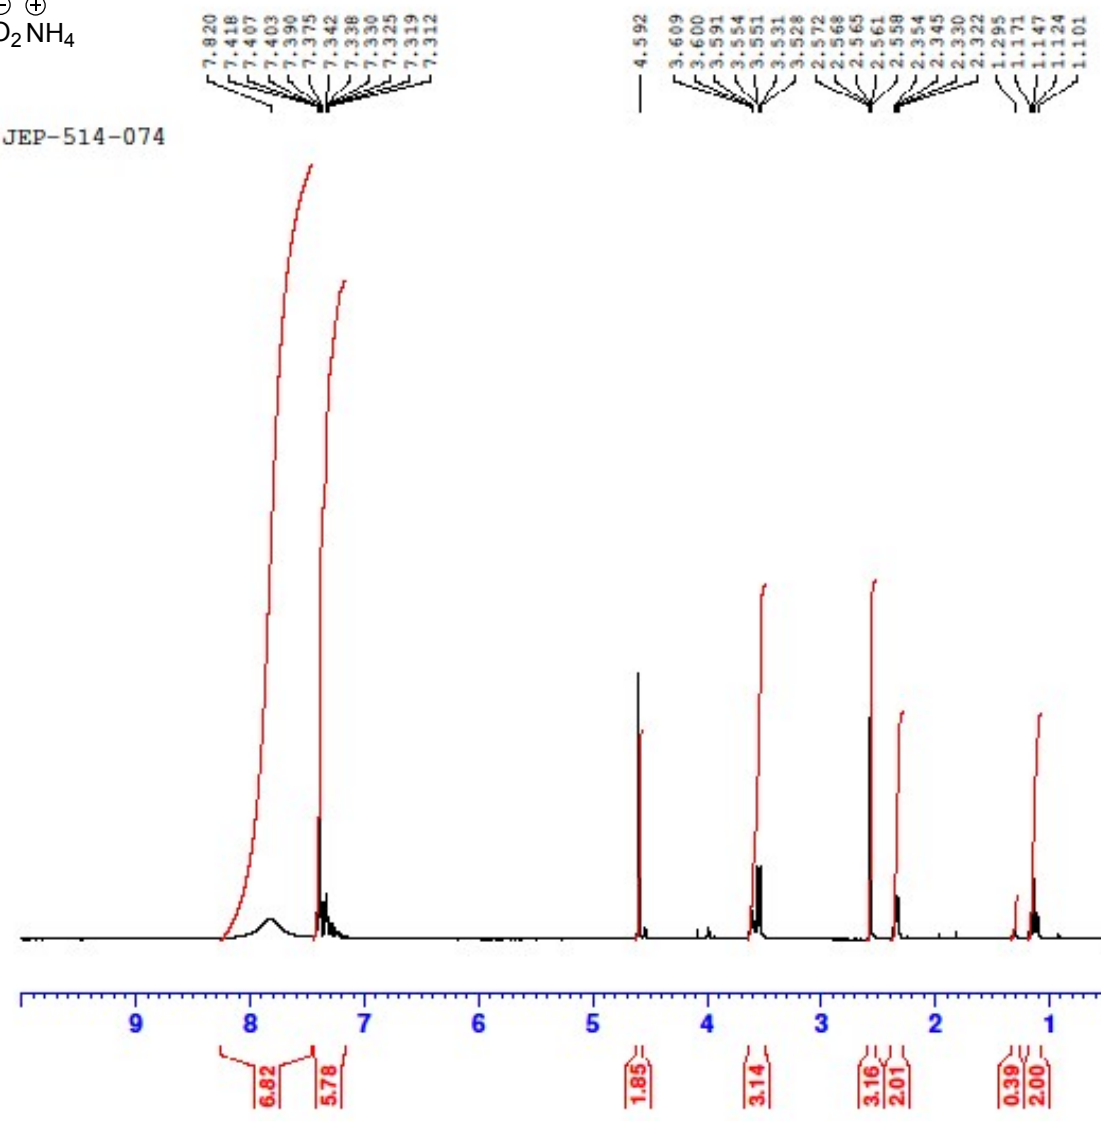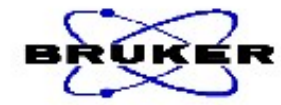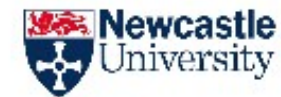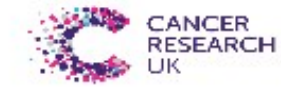

Current Data Parameters  
 NAME JEP-514-074  
 EXPNO 10  
 PROCNO 1

F2 - Acquisition Parameters  
 Date\_ 20150818  
 Time 8.41  
 INSTRUM spect  
 PROBHD 5 mm PABBO BB-  
 PULPROG zg30  
 ID 65536  
 SOLVENT DMSO  
 NS 16  
 DS 0  
 SWH 10330.578 Hz  
 FIDRES 0.157632 Hz  
 AQ 3.1719425 sec  
 RG 256  
 DW 48.400 usec  
 DE 11.99 usec  
 TE 297.0 K  
 D1 1.00000000 sec  
 TD0 1

==== CHANNEL f1 =====  
 SFO1 500.3030896 MHz  
 NUC1 1H  
 P1 16.25 usec  
 PLW1 18.33600044 W

F2 - Processing parameters  
 SI 65536  
 SF 500.2999717 MHz  
 WDW EM  
 SSB 0  
 LB 0.30 Hz  
 GB 0  
 PC 1.00

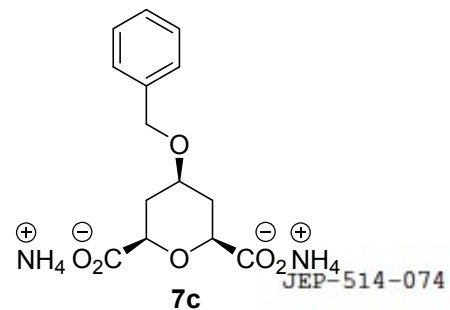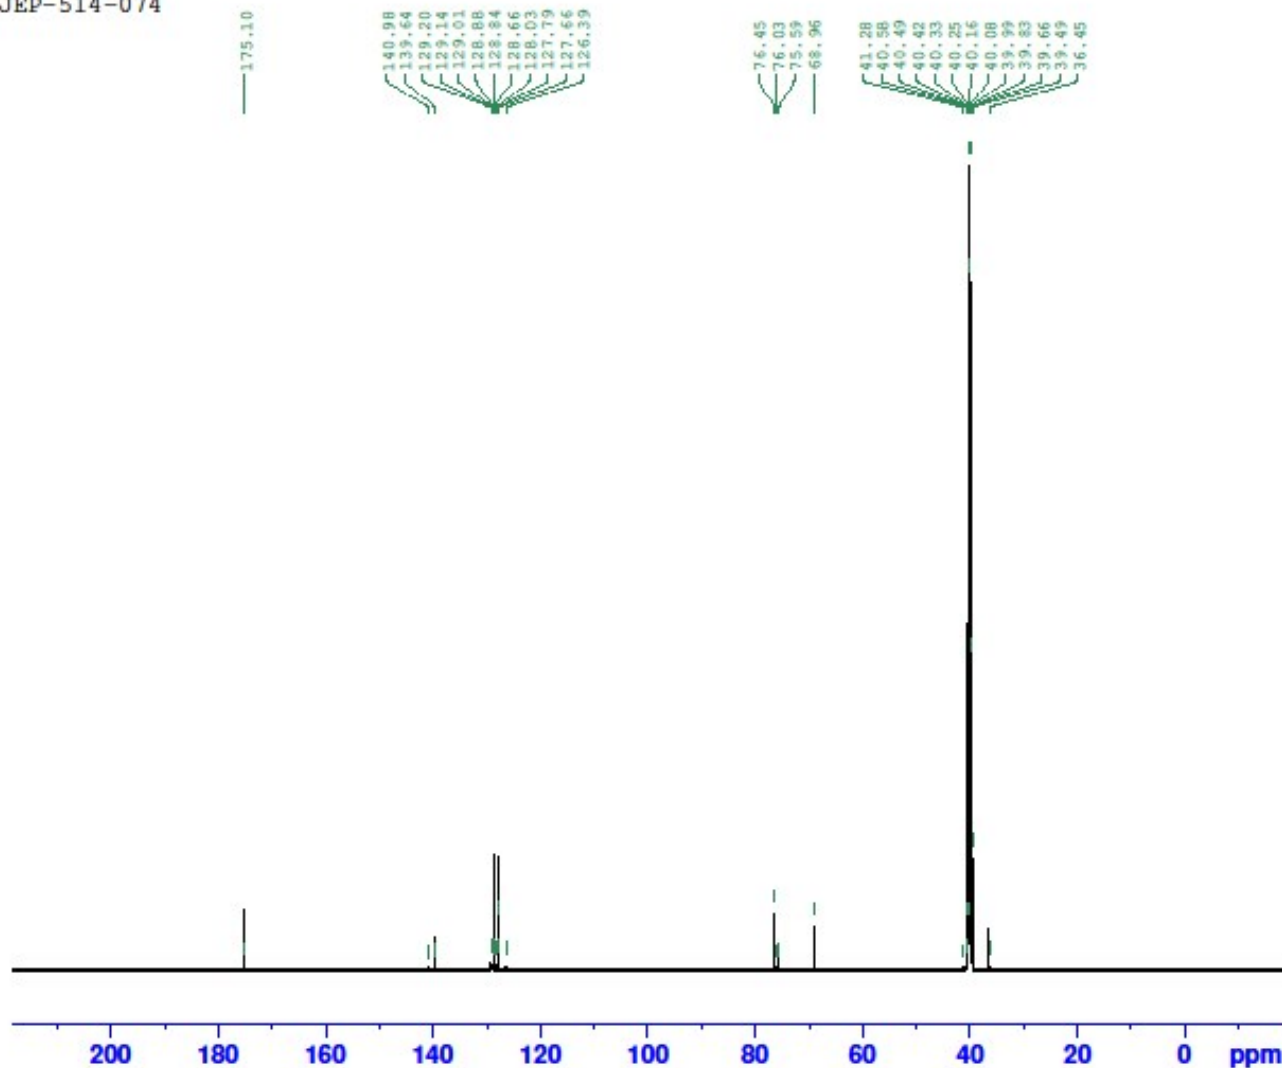

Current Data Parameters  
 NAME JEP-514-074  
 EXPNO 14  
 PROCNO 1

F2 - Acquisition Parameters  
 Date\_ 20150818  
 Time 21.45  
 INSTRUM spect  
 PROBHD 5 mm PABBO BB-  
 PULPROG zgpg30  
 TD 65536  
 SOLVENT DMSO  
 NS 2560  
 DS 2  
 SWH 29761.904 Hz  
 FIDRES 0.454131 Hz  
 AQ 1.1010048 sec  
 RG 575  
 DW 16.800 usec  
 DE 7.68 usec  
 TE 297.5 K  
 D1 2.00000000 sec  
 D11 0.03000000 sec  
 TD0 1

----- CHANNEL f1 -----  
 SFO1 125.8131151 MHz  
 NUC1 13C  
 P1 9.75 usec  
 PLW1 82.38999939 W

----- CHANNEL f2 -----  
 SFO2 500.3020012 MHz  
 NUC2 1H  
 CPDPRG[2] waltz16  
 PCPD2 80.00 usec  
 PLW2 18.33600044 W  
 PLW12 0.75654000 W  
 PLW13 0.48418999 W

F2 - Processing parameters  
 SI 65536  
 SF 125.8005350 MHz  
 WM EM  
 SSB 0  
 LB 1.00 Hz  
 GB 0  
 PC 1.40

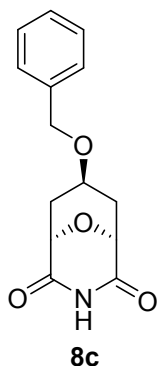

JEP-514-078

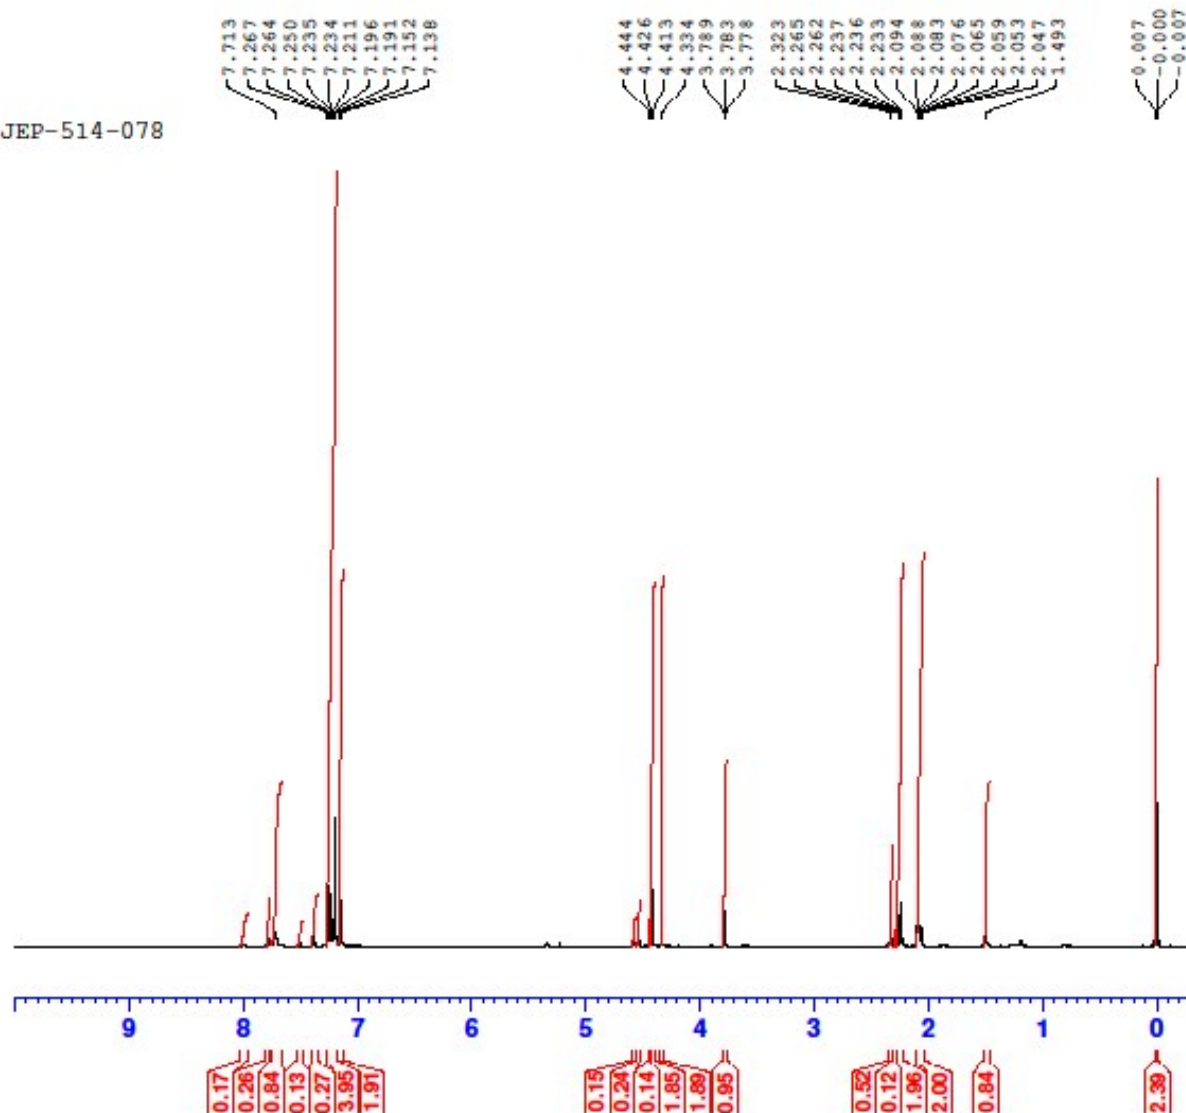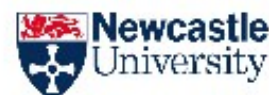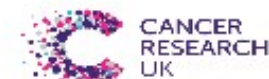

Current Data Parameters  
 NAME JEP-514-078  
 EXPNO 60  
 PROCNO 1

F2 - Acquisition Parameters  
 Date\_ 20150821  
 Time 16.14  
 INSTRUM spect  
 PROBHD 5 mm PABBO BB-  
 PULPROG zg30  
 ID 65536  
 SOLVENT CDCl3  
 NS 16  
 DS 0  
 SWH 10330.578 Hz  
 FIDRES 0.157632 Hz  
 AQ 3.1719425 sec  
 RG 512  
 DW 48.400 usec  
 DE 11.99 usec  
 TE 297.3 K  
 D1 1.00000000 sec  
 TDD 1

==== CHANNEL f1 =====  
 SFO1 500.3030896 MHz  
 NUC1 1H  
 P1 16.25 usec  
 PLW1 18.33600044 W

F2 - Processing parameters  
 SI 65536  
 SF 500.3000467 MHz  
 WDW EM  
 SSB 0  
 LB 0.30 Hz  
 GB 0  
 PC 1.00

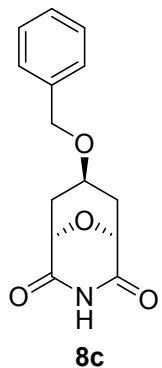

JEP-514-078

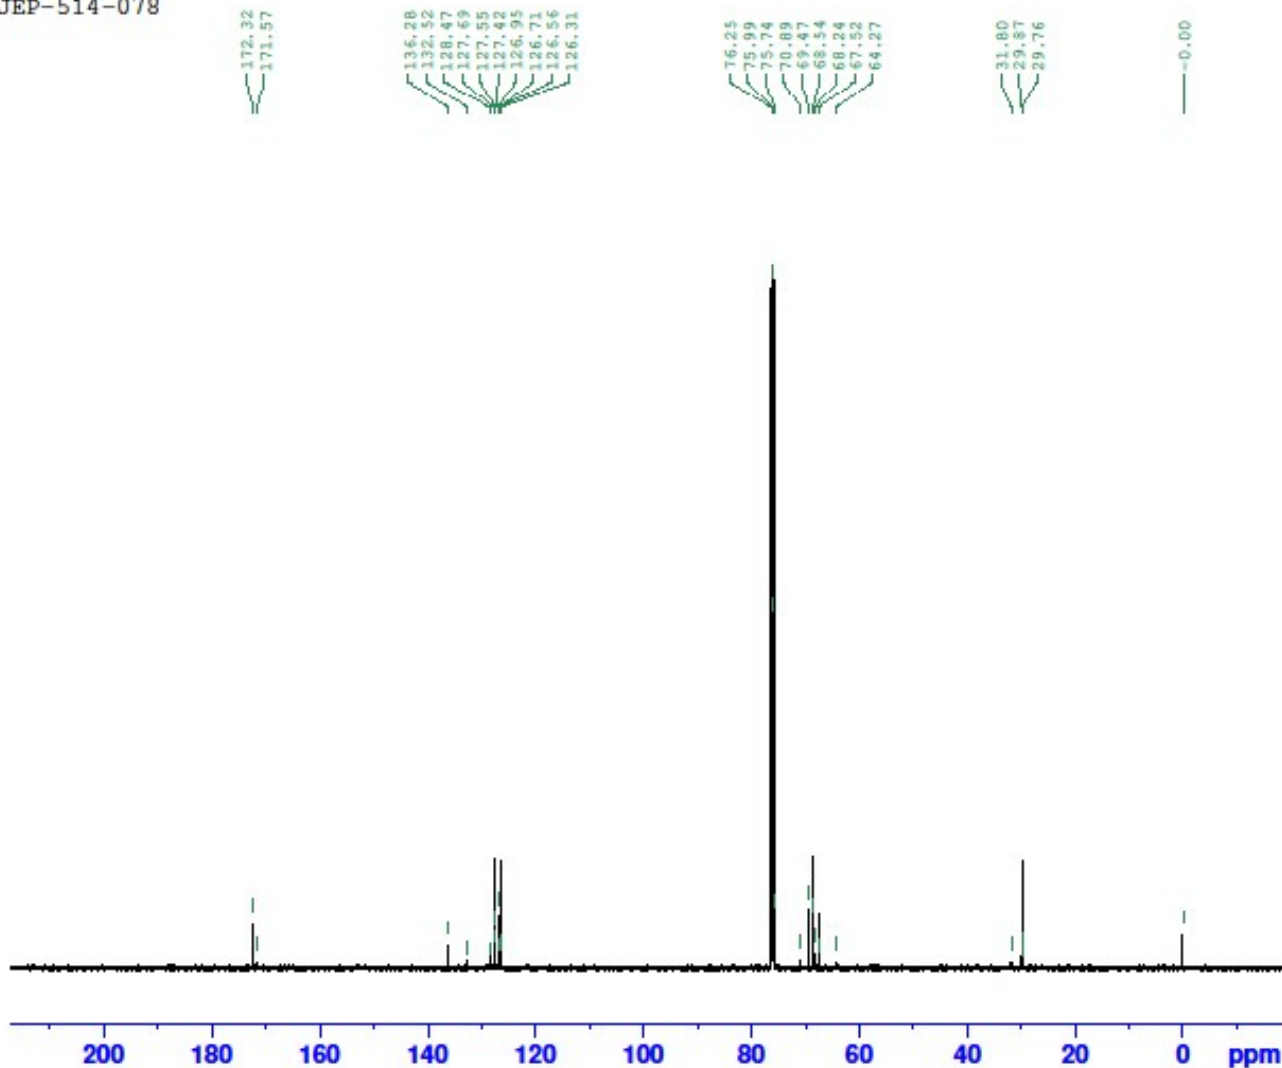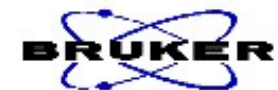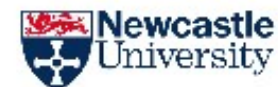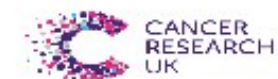

Current Data Parameters  
 NAME JEP-514-078  
 EXPNO 66  
 PROCNO 1

F2 - Acquisition Parameters  
 Date\_ 20150822  
 Time 5.20  
 INSTRUM spect  
 PROBHD 5 mm PABBO BB-  
 PULPROG zgpg30  
 TD 65536  
 SOLVENT CDCl3  
 NS 2560  
 DS 2  
 SWH 29761.904 Hz  
 FIDRES 0.454131 Hz  
 AQ 1.1010048 sec  
 RG 724  
 DW 16.800 usec  
 DE 7.68 usec  
 TE 298.3 K  
 D1 2.00000000 sec  
 D11 0.03000000 sec  
 TD0 1

----- CHANNEL f1 -----  
 SFO1 125.8131151 MHz  
 NUC1 13C  
 P1 9.75 usec  
 PLW1 82.38999939 W

----- CHANNEL f2 -----  
 SFO2 500.3020012 MHz  
 NUC2 1H  
 CPDPRG12 waltz16  
 PCPD2 80.00 usec  
 PLW2 18.33600044 W  
 PLW12 0.75654000 W  
 PLW13 0.48418999 W

F2 - Processing parameters  
 SI 65536  
 SF 125.8006643 MHz  
 EM  
 WDW 0  
 SSB 0  
 LB 1.00 Hz  
 GB 0  
 PC 1.40
